1 **Title: Sucrose promotes D53 accumulation and tillering in rice**

2 **Authors:** Suyash B. Patil<sup>1#</sup>; Francois F. Barbier<sup>2,3\*#</sup>; Jinfeng Zhao<sup>1#</sup>; Syed Adeel Zafar<sup>1</sup>;  
3 Muhammad Uzair<sup>1</sup>; Yinglu Sun<sup>1</sup>; Jingjing Fang<sup>1</sup>; Maria-Dolores Perez-Garcia<sup>4</sup>, Jessica  
4 Bertheloot<sup>4</sup>; Soulaiman Sakr<sup>4</sup>; Franziska Fichtner<sup>2,3</sup>; Tinashe G. Chabikwa<sup>2</sup>; Shoujiang Yuan<sup>5</sup>;  
5 Christine A. Beveridge<sup>2,3\*</sup> and Xueyong Li<sup>1\*</sup>

6  
7 <sup>1</sup>National Key Facility for Crop Gene Resources and Genetic Improvement, Institute of Crop  
8 Sciences, Chinese Academy of Agricultural Sciences, Beijing 100081, China.

9 <sup>2</sup>The University of Queensland, School of Biological Sciences, St. Lucia, QLD 4072, Australia.

10 <sup>3</sup>ARC Centre for Plant Success in Nature and Agriculture, The University of Queensland, St  
11 Lucia, Qld 4072, Australia;

12 <sup>4</sup>Institut Agro, Univ Angers, INRAE, IRHS, SFR 4207 QUASAV, 49000 Angers, France.

13 <sup>5</sup>Shandong Rice Research Institute, Jinan 250100, China.

14

15 \*Correspondence: [barbier.francois@hotmail.fr](mailto:barbier.francois@hotmail.fr); [c.beveridge@uq.edu.au](mailto:c.beveridge@uq.edu.au); [lixueyong@caas.cn](mailto:lixueyong@caas.cn)

16 # Authors contributed equally to this work

17

18 **Abstract (200 words max):**

- 19 - Shoot branching, a major component of shoot architecture, is regulated by multiple  
20 signals. Previous studies have indicated that sucrose may promote branching through  
21 suppressing the inhibitory effect of the hormone strigolactone (SL). However, the  
22 molecular mechanisms underlying this effect are unknown.
- 23 - Here we used molecular and genetic tools to identify the molecular targets underlying  
24 the antagonistic interaction between sucrose and SL.
- 25 - We showed that sucrose antagonises the suppressive action of SL on tillering in rice  
26 and on the degradation of D53, a major target of SL signalling. Sucrose inhibits the  
27 expression of *D3*, the orthologue of the arabidopsis F-box protein MAX2 required for  
28 SL signalling. Over-expression of *D3* prevents sucrose from inhibiting D53 degradation  
29 and enabled the SL inhibition of tillering under high sucrose. Sucrose also prevents SL-  
30 induced degradation of D14, the SL receptor involved in D53 degradation.  
31 Interestingly, *D14* over-expression enhances D53 protein levels and sucrose-induced  
32 tillering.
- 33 - Our results show that sucrose inhibits SL perception by targeting key components of  
34 SL signalling and, together with previous studies reporting the inhibition of SL  
35 synthesis by nitrate and phosphate, demonstrate the central role played by  
36 strigolactones in the regulation of plant architecture by nutrients.

37

38 **Keywords:** strigolactones, sugar hormone interactions, shoot branching, plant architecture

## 39 Introduction

40 Plants are sessile organisms that have evolved the ability to adapt to constantly changing  
41 environmental conditions. Shoot branching regulation in angiosperms allows plants to adjust  
42 to a given environment, contributes to the overall plant architecture and is considered as an  
43 important economic trait for horticulture and agriculture (Wang *et al.*, 2018; Li *et al.*, 2019;  
44 Guo *et al.*, 2020). Thus, the study of shoot branching is of major importance for food security,  
45 given the increasing global population.

46 Shoot branching is regulated by different processes including apical dominance, a  
47 phenomenon observed in many plants whereby the growing shoot apex inhibits the growth  
48 of axillary buds on the same stem. Factors such as herbivory, pruning, and accidental damage  
49 to the main shoot break this dominance, allowing lateral buds to grow into branches.  
50 Moreover, depending on the environmental conditions, buds can be induced to grow into  
51 branches, thus allowing plant architecture to adapt to the prevailing conditions. The shoot tip  
52 inhibits axillary bud outgrowth by producing a basipetal flow of auxin in the adjacent stem  
53 (Thimann & Bonner, 1933; Domagalska & Leyser, 2011; Barbier *et al.*, 2017) and because the  
54 rapid growth of the shoot tip diverts nutrients away from axillary buds (Mason *et al.*, 2014;  
55 Rameau *et al.*, 2015; Barbier *et al.*, 2019b).

56 Part of the inhibitory effect of auxin on shoot branching is mediated by the phytohormones,  
57 strigolactones (SL). The apically-derived auxin upregulates the expression of strigolactone  
58 synthesis genes in the stem (Domagalska & Leyser, 2011; Rameau *et al.*, 2015). SL are sensed  
59 by DWARF14 (D14), an  $\alpha/\beta$  hydrolase (Arite *et al.*, 2009; Hamiaux *et al.*, 2012), which then  
60 interacts with the F-box protein DWARF3 (D3), the rice orthologue of the arabidopsis MORE  
61 AXILLARY GROWTH2 (MAX2), to form a Skp1-Cullin-F-box (SCF) E3 ubiquitin ligase (SCF<sup>D3/MAX2</sup>)  
62 complex (Zhao *et al.*, 2014). DWARF53 (D53) protein is degraded by the SL-mediated  
63 ubiquitination and proteasomal degradation through the D14–SCF<sup>D3</sup> complex (Jiang *et al.*,  
64 2013; Zhou *et al.*, 2013). Gain-of-function *d53* mutants in rice and arabidopsis display highly  
65 branched phenotypes, and loss-of-function can recover the highly branched phenotype of  
66 mutants deficient in SL levels or signalling (Jiang *et al.*, 2013; Zhou *et al.*, 2013). The TEOSINTE  
67 BRANCHED1, CYCLOIDEA, and PCF (TCP) family transcription factor TEOSINTE BRANCHED1  
68 (TB1) acts as a negative regulator of tillering and is known as an important hub, integrating

69 different signals, including SL, that induce *TB1* gene expression (Takeda *et al.*, 2003; Aguilar-  
70 Martínez *et al.*, 2007; Minakuchi *et al.*, 2010; Dun *et al.*, 2012; Wang *et al.*, 2019a).

71 Auxin treatment is not always enough to restore apical dominance after shoot tip removal  
72 (Cline, 1996; Beveridge, 2000; Morris *et al.*, 2005; Barbier *et al.*, 2021). As demonstrated upon  
73 decapitation in pea, auxin depletion in the stem does not correlate with initial bud growth  
74 (Morris *et al.*, 2005; Ferguson & Beveridge, 2009). In this species, this initial bud outgrowth  
75 has been correlated with rapid remobilisation of carbohydrates towards the buds (Mason *et al.*  
76 *et al.*, 2014; Fichtner *et al.*, 2017). Beyond their trophic role, sugars also act as signalling  
77 molecules, allowing plants to adjust their metabolism, growth and development to their  
78 environment (Rolland *et al.*, 2006; Sakr *et al.*, 2018; Fichtner *et al.*, 2021b). A signalling role  
79 for sugars in bud outgrowth and shoot branching has been reported for different species  
80 (Takahashi *et al.*, 2014; Barbier *et al.*, 2015b,a). The low abundant metabolite trehalose 6-  
81 phosphate (Tre6P), a sucrose-specific signalling molecule (Fichtner & Lunn, 2021),  
82 accumulates rapidly in pea buds upon decapitation (Fichtner *et al.*, 2017) and promotes shoot  
83 branching in arabidopsis (Fichtner *et al.*, 2021a). The HEXOKINASE1 (HXK1) signalling pathway  
84 (Moore *et al.*, 2003) was also recently shown to promote shoot branching in arabidopsis and  
85 to interact with both, the CK and SL pathways (Barbier *et al.*, 2021). A recent study comparing  
86 transcriptomes of annual and perennial plants correlated the expression of genes involved in  
87 carbon starvation with bud dormancy (Tarancón *et al.*, 2017). In different eudicots, sugar  
88 supply to the plant can promote shoot branching (Mason *et al.*, 2014; Barbier *et al.*, 2015b;  
89 Dierck *et al.*, 2016); however, this has not yet been reported for monocot plants.

90 The interactions among sugars and hormones during the control of bud outgrowth are not  
91 yet fully resolved. Recent studies have indicated that sucrose can antagonise the effect of  
92 auxin by inhibiting SL perception to promote bud outgrowth (Bertheloot *et al.*, 2020) and that  
93 the promotion of growth by cytokinins may only be effective under conditions where sugars  
94 are not readily available (Barbier *et al.*, 2015b; Salam *et al.*, 2021). Interactions between  
95 sugars and strigolactones have been recently highlighted in rice during the control of shoot  
96 architecture by the circadian clock (Wang *et al.*, 2020). Interestingly, sucrose application to  
97 single-node cuttings of rose buds can suppress *MAX2* and *BRANCHED1* (*BRC1*, the arabidopsis  
98 orthologue of *TB1*) gene expression (Barbier *et al.*, 2015b; Wang *et al.*, 2019b). In sorghum  
99 (*Sorghum bicolor*), defoliation and shade treatments, which decrease sugar availability, inhibit



100 bud outgrowth and up-regulate *MAX2* expression (Kebrom *et al.*, 2010; Kebrom & Mullet,  
101 2015).

102 The aim of this study was to test whether sugar availability affects SL-induced tillering  
103 inhibition in rice and to make the first steps towards identifying the molecular components  
104 involved. Using physiological experiments and genetic tools, we sought to identify which  
105 components of SL signalling are targeted by sucrose during tillering in rice, and bud outgrowth  
106 in pea. Since both sugar and SL levels in plants are controlled by environmental factors, this  
107 study will shed light on how environmental factors may regulate branching and tillering at the  
108 molecular level.

109

## 110 **Materials and Methods**

### 111 **Plant material and growth conditions**

112 For rice, available lines created in different backgrounds were used as indicated in the figure  
113 legends, and the corresponding wild types were used as controls. The tiller development  
114 assay in response to sucrose and GR24 was performed using the *japonica* cultivar  
115 HuaiDao5 (Patil *et al.*, 2019). The seeds were sterilised as per the method described earlier  
116 (Zhao *et al.*, 2014) with slight modifications. In brief, de-husked seeds were sterilised with  
117 30% NaClO solution in a shaker for 30 minutes and then washed with sterilised de-ionised  
118 water at least five times. The seeds were directly sown on the solidified (0.5% agar) half-  
119 strength MS media with different sucrose concentrations with adjusted pH of 5.8. For the SL  
120 treatments, rac-GR24 was used in all the experiments (CX23880, Chiralix). The plants were  
121 grown on the different sucrose concentrations for three weeks with or without 1  $\mu$ M GR24  
122 under a 16-hr light (200  $\mu$ mol m<sup>-2</sup> s<sup>-1</sup>)/8 hr dark cycle at 28°C in a growth chamber. The GR24  
123 and the corresponding treatment combinations were replaced at weekly intervals,  
124 maintaining strictly sterile conditions.

125 The calli of wild-type (WT) plants (HuaiDao5) grown on NB media plates at 28°C in the dark  
126 were used for the D53 protein degradation assay. The *D3* and *D14* over-expressing lines and  
127 their corresponding mutant and WT lines were used from the earlier work (Zhao *et al.*, 2014).  
128 The lines were maintained in field condition at the experimental station of Shandong Rice

129 Research Institute, Shandong, China. The lines used for sucrose sensitivity assay consisted of  
130 *d3* (*s2-215<sup>Q393Stop</sup>*) (Patil *et al.*, 2019) and *d14* (*htd-2*) (Liu *et al.*, 2009) mutants in the  
131 Nipponbare WT background.

132 For pea, decapitation and sucrose petiole feeding experiments were performed on the  
133 Torsdag L107 background. *In vitro* sucrose treatment with single nodes was performed as  
134 described earlier (Bertheloot *et al.*, 2020) in the *rms3*, *rms4* mutants and their corresponding  
135 WT Terese. For the decapitation experiment, plants were grown in a glasshouse with a  
136 controlled environment (Fichtner *et al.*, 2017). For the sucrose petiole feeding experiment,  
137 plants were grown in a growth chamber with 16 hrs of light ( $125 \mu\text{mol m}^{-2} \text{s}^{-1}$ ) at a temperature  
138 of 22°C during the day and of 20°C at night.

139

#### 140 **Rice callus induction**

141 Husks were removed from rice seeds which were then sterilized with the 30% NaClO solution  
142 and washed for multiple times with sterilized deionized water. The seeds were then placed  
143 on solidified NB media petri-plates in the dark at 28°C for one week. The embryonic calli were  
144 then separated and multiplied on fresh NB media plates maintained at 28°C in the dark. To  
145 prepare 1 L NB medium, 4.1 g NB basal medium (Phytotech lab), 2 g Casein hydrolysate, 4 g  
146 L-Proline, 2 g L-Glutamine, 200  $\mu\text{l}$  2-4-Dichlorophenoxyacetic acid ( $10 \text{ mg ml}^{-1}$ ), 30 g sucrose  
147 (adjusted depending on experimental needs) and 3 g Phytigel were mixed together (pH =  
148 5.8).

149

#### 150 **Protein quantification assay using callus tissues and tiller buds**

151 The calli were grown on NB media plates containing different sucrose concentrations. Around  
152 250 mg callus tissue was ground in liquid nitrogen, using a mortar and pestle to make a fine  
153 powder. The powder was transferred to 1.5 ml microcentrifuge tubes and mixed with 250  $\mu\text{l}$   
154 of ice-cold TBT buffer (100 mM AcOK, 20 mM KHEPES pH 7.4, 2 mM MgCl<sub>2</sub>, 0.1% Tween-20,  
155 1 mM DTT, and 0.1% protease inhibitor cocktail). The antibody preparation, samples  
156 preparation, and protein blots were developed as per the method described earlier (Jiang *et*

157 *al.*, 2013). The D53-specific polyclonal antibody produced in mouse was used for immune  
158 detection following 1:1000 dilution in non-fat dairy milk. Anti-HSP82 or anti-actin was used  
159 as a loading control following 1:3000 dilution. Horse-radish peroxidase-conjugated anti-  
160 mouse IgG was used as a secondary antibody (CWBIO, Beijing, China) following 1:3000  
161 dilution. The western blots were developed using Tanon™ High-sig ECL western blotting  
162 Substrate (Cat. no:180-5001) with a Tanon 6100 chemiluminescent imaging system. For each  
163 Western blot, the band intensity of the target and loading control proteins was determined  
164 using the “Gels” analysing tool in ImageJ. The values of the target proteins were then  
165 normalized by the values of the loading control, and the values were presented relative to the  
166 control condition for each genotype to ease comparison across treatments.

167

#### 168 **Gene expression analysis**

169 For rice, shoot base tissues (0.5 cm) were harvested from two-week-old seedlings grown  
170 hydroponically. Total RNA was isolated using RNAPrep Pure Plant Kit (Tiangen, Beijing, China,  
171 cat. no. DP432) following the manufacturer’s instructions. Reverse transcription of 500 ng  
172 RNA was performed using the Vazyme, HiScript II Q Select RT SuperMix for qPCR (cat no.  
173 R233). Real-time quantitative PCR was performed by Vazymes Cham Q QPCR reagent kit (cat  
174 no. Q331) using the ABI Prism 7500 Sequence Detection System as per the program  
175 recommended by both the instrument and the reagent company. Transcript levels were  
176 detected by CT values relative to *ACTIN1* as a reference gene. All the primer sequences used  
177 in this study are listed in Supplementary Table S1. Gene expression in pea buds was monitored  
178 using a phenol/chloroform free CTAB-based method as described earlier (Barbier *et al.*,  
179 2019a).

180

#### 181 ***Nicotiana benthamiana* leaf agroinfiltration and *in vitro* luciferase activity assay**

182 The pCambia1200 vector was modified by integrating Firefly luciferase and Renilla luciferase  
183 coding sequences driven by the CaMV35S promoter in addition to the hygromycin resistance  
184 marker. The vector then called pCambia1200 35S-LUC had both transient and stable  
185 expression capabilities (Figure S2) (Sun *et al.*, 2021). The coding sequence of the *D53* gene

186 was amplified using D53 LUC-F-GGGCGGAAAGGAATTCATGCCCACTCCGGTGG and D53 LUC-R-  
187 TAGATCCGGTGGATCCTCAACAATCTAGAATTATTCTTGGCGGGAG primer pairs and cloned at the C-  
188 terminal region of the Firefly luciferase gene using *EcoRI* and *BamHI* restriction sites following  
189 the In-fusion® cloning system by Clontech, Takara biotech, Japan. The plasmids were  
190 transformed into the Agrobacterium strain EHA105 to transfect into *Nicotiana benthamiana*  
191 leaves for the transient expression of the D53-Firefly luciferase fused protein. This vector also  
192 consists of a Renilla luciferase gene as an internal control which was used to quantify the  
193 relative amount of the D53 protein levels. The Agrobacterium strain was transfected into the  
194 *N. benthamiana* leaves as per the methods described earlier (Chen *et al.*, 2008). To check the  
195 effects of sucrose and GR24 on the transiently expressed D53 levels, different treatment  
196 combinations were infiltrated directly into the leaves already transfected with the  
197 Agrobacterium strain harbouring the luciferase-fused D53 construct. The leaves were then  
198 harvested in liquid nitrogen, and the activities of Firefly luciferase and Renilla luciferase were  
199 determined using the Dual-luciferase® reporter assay system from Promega (cat. no. E1910).  
200 The LUC activity was calculated by normalising Firefly luciferase values with Renilla luciferase  
201 and was presented as relative luciferase values.

202

## 203 **Results**

### 204 **Sucrose and strigolactones interact antagonistically to regulate tillering in rice**

205 In dicotyledonous models, sucrose has been shown to promote axillary bud outgrowth and  
206 alleviate the inhibitory effect of SL during this process (Dierck *et al.*, 2016; Bertheloot *et al.*,  
207 2020). However, this antagonistic interaction has not been reported in monocotyledons  
208 plants, which have a different architecture compared with eudicots, and are evolutionarily  
209 distant. To evaluate sucrose and SL effects on tillering bud outgrowth in rice, we grew wild-  
210 type (WT) Huaidao-5 plants hydroponically with different sucrose concentrations with or  
211 without 1 µM rac-GR24 (a synthetic SL analogue). To be in a physiological range of sucrose  
212 concentrations, we added up to 4% sucrose (~120 mM), which is lower than the endogenous  
213 sucrose levels reported in rice (between 200 mM and 600 mM) (Hayashi & Chino, 1990). We  
214 observed that sucrose triggered bud elongation in a dose-dependent manner with or without  
215 addition of rac-GR24 (Figure 1). In the absence of sucrose, tiller bud elongation remained  
216 suppressed. With 2% sucrose, GR24 strongly inhibited tiller bud elongation (73% inhibition)

217 (Figure 1B). However, with 4% sucrose, the inhibitory effect of GR24 on tiller bud elongation  
218 was reduced to 30% inhibition. A two-way ANOVA demonstrated that the effect of GR24  
219 largely depends on the concentration of sucrose ( $p$ -value = 0.000019). In contrast to sucrose,  
220 sorbitol only had a very small promoting effect on tillering and barely alleviated the inhibitory  
221 effect of GR24, showing that the effect of sucrose was largely independent of an osmotic  
222 effect (Supplementary Figure S1). These phenotypic data support a similar hypothesis as  
223 proposed previously for selected eudicots, namely that sucrose and SL interact  
224 antagonistically to regulate tillering.

225

### 226 **Sucrose inhibits GR24-induced degradation of D53 protein in rice**

227 The D53 protein and its orthologues in arabidopsis SMXL6, 7 and 8 play a crucial role in SL-  
228 mediated shoot branching in rice (Jiang *et al.*, 2013; Zhou *et al.*, 2013) and arabidopsis  
229 (Soundappan *et al.*, 2015; Wang *et al.*, 2015), respectively. Since sucrose reduces the SL  
230 response, we proposed that sucrose might promote D53 accumulation. We therefore tested  
231 the impact of sucrose on D53 accumulation. Since dormant tiller buds are very small and D53  
232 protein levels are difficult to detect in shoot tissues, we first used rice calli, which have  
233 previously been successfully used for this purpose (Jiang *et al.*, 2013). In the absence of GR24  
234 in the growth medium, the D53 protein levels strongly increased with the increasing sucrose  
235 concentration (Figure 2A)

236 We then tested the effect of sucrose on D53 in the presence of GR24. As the calli grown on  
237 different sucrose concentrations accumulate different levels of D53, calli grown on 4%  
238 sucrose plates showing a similar amount of D53 protein were used. The calli were washed  
239 twice with sterile water to remove the exogenous sucrose before being transferred to liquid  
240 media containing either no sucrose, or 4% sucrose. After 30 minutes of stabilisation, 0.5  $\mu$ M  
241 GR24 was supplemented to the 0% and 4% sucrose treatments. In the absence of sucrose,  
242 D53 protein was degraded within 5 minutes of treatment with GR24. However, in the  
243 presence of 4% sucrose, it took 20 minutes for GR24 to lead to a similar degradation of the  
244 D53 protein (Figure 2B).

245 To confirm this result, we tested OsD53 degradation in response to sucrose and GR24 in  
246 *Nicotiana benthamiana* leaves transiently expressing an *OsD53* coding sequence fused to a  
247 LUCIFERASE (LUC) reporter (Supplementary Figure S2). D53 protein accumulation was  
248 assessed by measuring the LUC activity normalised with Renilla luciferase values. Without  
249 GR24, sucrose had a minor effect on LUC activity which was only significantly enhanced by  
250 sucrose at 8 hrs. In the absence of sucrose, the LUC activity was lower in the presence rather  
251 than in the absence of GR24 at 4 hr and 8 hr after hormone or control treatment. However,  
252 in the presence of 4% sucrose, the LUC activity was similar with or without GR24 (Figure 2C).  
253 Again, these observations show that D53 protein levels are maintained at higher levels in the  
254 presence of sucrose and that the degradation rate of D53 in response to GR24 is lower under  
255 these sucrose conditions.

256 To observe whether results from calli and agroinfiltrated *N. benthamiana* may be relevant *in*  
257 *planta*, we measured D53 proteins levels in dormant tiller buds (length < 3 mm) harvested  
258 from plants fed hydroponically with 4% sucrose for one hour, and in which tiller buds were  
259 only subjected to the plant's endogenous SL levels. The result indicated that supplying 4%  
260 sucrose to rice plants grown hydroponically promoted the accumulation of the D53 protein  
261 in dormant tiller buds (Figure 2D), further supporting the hypothesis that sucrose promotes  
262 D53 accumulation during tillering regulation.

263

#### 264 **Sucrose inhibits the expression of genes involved in strigolactone signalling**

265 D53 promotes the outgrowth of tillers by inhibiting the expression of the TCP transcription  
266 factor gene *TB1* (Takeda *et al.*, 2003; Minakuchi *et al.*, 2010). Given the accumulation of D53  
267 proteins in response to sucrose (Figure 2), we predicted that sucrose treatment should  
268 suppress *TB1* expression. To test this, we measured *TB1* expression in rice calli treated with a  
269 range of sucrose concentrations. The results show that sucrose inhibited the expression of  
270 *TB1* in rice callus tissues in a dose-dependent manner (Figure 3A).

271 We then determined whether the change in D53 protein levels could be explained by a change  
272 in *D53* expression at the transcript level. Our results indicate that, in contrast to *TB1*  
273 expression and the D53 protein level, *D53* gene expression is not responsive to sucrose (Figure

274 3B). These observations suggest that sucrose promotes D53 protein accumulation through a  
275 post-transcriptional mechanism.

276 We then tested whether the observations made on calli were relevant to tissues where the  
277 regulation of tillering occurs. To do so, we harvested dormant tiller buds (length < 3 mm) and  
278 shoot bases (length = 5 mm), enriched in buds and stem. As in calli, sucrose treatment through  
279 hydroponic media down-regulated the expression of *TB1* (Figure 3A) in tiller buds and in shoot  
280 bases. The expression of *D53* was not affected by sucrose in calli or in the shoot base, but was  
281 repressed by 4% sucrose in tiller buds. This is consistent with the negative correlation  
282 reported for D53 protein level and *D53* gene expression (Zhou *et al.*, 2013).

283 Given that sucrose reduces SL response in buds (Dierck *et al.*, 2016; Bertheloot *et al.*, 2020)  
284 (Figure 1) and enhances the level of D53 protein (Figure 2), we predicted that sucrose may  
285 affect components of the SCF complex formed by D14 and D3, which are required for D53  
286 protein degradation (Zhou *et al.*, 2013; Zhao *et al.*, 2014). Consistent with such a role of D3  
287 and D14 in sucrose regulation of D53, *D3* and *D14* gene expression was significantly reduced  
288 by sucrose in calli, tiller buds and shoot bases, although the inhibition of *D14* in shoot bases  
289 was milder compared to the inhibition of *D3* expression in this tissue (Figure 3C,D).

290 We then tested whether sucrose could also directly regulate D14 or D3 protein levels. To do  
291 so, we tested the impact of 4% sucrose on D14 and D3 accumulation in calli of transgenic lines  
292 over-expressing HA-tagged *D14* or *D3* driven by the constitutively active *OsACTIN1* promoter  
293 (*ACTp*) in the *d14* and *d3* mutant background, respectively (Supplementary Figure S3). In  
294 these lines, we expected stable synthesis of the tagged proteins. To establish this approach,  
295 we first observed that the HA-tagged over-expressing lines complemented the tiller number  
296 and almost fully complemented the plant height phenotypes of the corresponding *d14* and  
297 *d3* mutants (Supplementary Figure S4). In the absence of sucrose, GR24 led to the almost  
298 complete degradation of the D14 protein over 12 hrs in the HA-D14 over-expression line  
299 (Figure 3E). This indicates that the GR24-induced degradation rate of the HA-D14 protein in  
300 the absence of sucrose exceeds the stable rate of HA-D14 synthesis in this line. Strikingly, in  
301 the presence of sucrose, GR24 did not affect the levels of HA-D14 (Figure 3E). This indicates  
302 that sucrose antagonises GR24-induced degradation of D14. In contrast, D3 protein levels in  
303 the HA-D3 over-expression line were quite stable in response to GR24 and sucrose (Figure



304 3F). Altogether, this suggests that sucrose inhibits the GR24-induced D14 degradation and  
305 does not directly regulate D3 protein levels.

306

### 307 **D3/OsMAX2 over-expression prevents the regulation of D53 by sucrose**

308 If sucrose acts via D14 and/or D3 to regulate D53 protein accumulation as indicated above  
309 (Figure 3A-D), we would predict that over-expression of one or both of these two genes would  
310 prevent sucrose from promoting D53 accumulation and may prevent sucrose-induced  
311 tillering. To test the sucrose response over a short time frame, we grew the calli of *ACTp:D3*,  
312 *ACTp:D14* over-expression lines on NB medium plates supplemented with 1% sucrose. Since  
313 these lines have been created in different backgrounds (GSOR300002 and GSOR300192,  
314 respectively), these cultivars were used as controls. The calli were then washed and rinsed for  
315 60 min with sterile water. The calli were then shifted to liquid media containing 4% sucrose  
316 and collected after 0, 2, 4 and 8 hrs to determine D53 protein levels. In two WT backgrounds,  
317 an increase in D53 levels was observed in response to sucrose (Figure 4A,B). Constitutive over-  
318 expression of *D14* or *D3* diminishes the response of D53 to sucrose but in two different and  
319 opposite ways. *D14* overexpression causes a high level of D53 protein, regardless of the  
320 sucrose supply. In contrast *D3* overexpression prevents accumulation of D53 under sucrose  
321 treatment. These results indicate that *D3* over-expression prevents sucrose-induced D53  
322 accumulation, while *D14* over-expression mimics the effect of sucrose supply on D53 protein  
323 levels.

324 Since sucrose and SL have an antagonistic effect on D53 protein levels (Figure 2B-C), we  
325 measured D53 protein levels in rice calli over-expressing *D14* and *D3* in response to both GR24  
326 and sucrose. As observed in Figure 2, the effect of GR24 on D53 degradation was delayed by  
327 sucrose treatment in the WTs (Figure 4C and 4E). *D14* overexpression did not prevent the  
328 promoting effect of sucrose on D53 levels (Figure 4D). In contrast, *D3* over-expression led to  
329 total degradation of D53 after 5 minutes of GR24 treatment, regardless of the sucrose  
330 concentration in the medium (Figure 4F). These results suggest that *D3* over-expression, but  
331 not that of *D14*, prevents sucrose from antagonising the SL-induced D53 degradation.



332 Similar findings to those obtained in rice calli were also observed in *N. benthamiana* leaves.  
333 In this system the native *N. benthamiana* *MAX2/D3* expression was also inhibited by sucrose  
334 (Figure 4G). We thus tested whether over-expressing *D3* in *N. benthamiana* leaves would also  
335 prevent sucrose from antagonising the effect of SL on D53 accumulation. We therefore  
336 followed the same procedure as described in Figure 2C and co-transfected D53-LUC with a  
337 *35Sp:D3* construct into *N. benthamiana* leaves. In this system, 4% sucrose almost totally  
338 alleviated the effect of GR24 on D53 degradation when D53-LUC was solely transfected  
339 (Figure 4H). However, when the LUC-D53 construct was co-transfected with the *35Sp:D3*  
340 over-expressing construct, sucrose could not prevent the negative effect of GR24 on D53  
341 levels (Figure 4H). The same trend was also observed in a second independent experiment  
342 (Supplementary Figure S5). These results further support the hypothesis that sucrose  
343 alleviates the inhibitory effect of GR24 on D53 protein levels by inhibiting *D3/MAX2*  
344 expression.

345 We then tested whether sucrose could still have a promoting effect on D53 levels in the *d3*  
346 mutant. To do so, we grew WT and *d3* rice calli on 4% sucrose for three weeks, rinsed them  
347 with water and transferred them on a range of sucrose concentrations with 0.5  $\mu$ M GR24 for  
348 10 min. The result shows that D53 accumulates a lot more in the *d3* than in the WT  
349 background, as expected in presence of GR24 (Figure 4I). However, we could observe a strong  
350 accumulation of D53 in response to sucrose in the WT calli, while no obvious pattern was  
351 observed in the *d3* background. This suggests that the positive effect of sucrose on D53  
352 accumulation is visible only if D3 is functional, at least in presence of SL and on this short time-  
353 frame.

354 To further investigate whether sucrose could act through D3-independent pathways to  
355 regulate D53 protein levels, we measured D53 in WT and *d3* calli grown on a range of sucrose  
356 for six weeks without SL (Figure 4J). In these conditions we could observe a positive effect of  
357 sucrose in both backgrounds. We also measured *TB1* expression in WT, *d3* and *d14* calli fed  
358 for 24 hrs with a range of sucrose concentrations without SL (Supplementary Figure S6). The  
359 results indicate that *TB1* expression remains responsive to sucrose in the three backgrounds.  
360 Altogether, these results suggest that sucrose may also act through D3-independent  
361 pathway(s) to regulate D53 protein levels and *TB1* expression in calli, at least without  
362 exogenous SL supplementation.

363 ***D3/OsMAX2* over-expression prevents the promoting effect of sucrose on tillering**

364 Given that *D53* promotes tillering (Jiang *et al.*, 2013; Zhou *et al.*, 2013) and that over-  
365 expression of *D3*, but not *D14*, prevents the sucrose-induced accumulation of *D53* (Figure 4),  
366 we tested whether *D3* overexpression in particular would prevent sucrose-induced tillering.  
367 WT and lines over-expressing *D3* and *D14* were grown on 0%, 0.5%, 2% and 4% sucrose  
368 media with or without 1  $\mu$ M GR24 for three weeks. As recorded in our previous experiment  
369 (Figure 1), 4% sucrose could antagonise the inhibitory effect of GR24 on tiller bud elongation  
370 in the WT lines (Figure 5 A,C). As observed in Figure 1B, two-way ANOVA comparison  
371 demonstrated that the impact of GR24 significantly depends on sucrose in the two WT  
372 backgrounds ( $p$ -value = 0.00004 for GSOR300192 and  $p$ -value = 0.0348 for GSOR300002). This  
373 antagonistic effect between GR24 and sucrose was also observed in the *D14* over-expression  
374 line (Figure 5B). Strikingly, *D14* over-expression strongly increased the effect of sucrose on  
375 tiller length (Figure 5 A,B). In contrast with WT and the *D14* over-expression line, *D3* over-  
376 expression inhibited the bud response to sucrose most prominently in presence of GR24 (77%  
377 inhibition with 4% sucrose) (Figure 5D). Multiple-way ANOVA comparison revealed that the  
378 interaction between sucrose and GR24 did not depend on *D14*-overexpression ( $p$ -value =  
379 0.33), whereas it showed that this interaction is highly dependent on *D3* over-expression  $p$ -  
380 value = 0.000002). Our data indicate that *D3* over-expression inhibits tiller bud elongation in  
381 the absence of sucrose, contrasting with results observed in arabidopsis (Stirnberg *et al.*,  
382 2007). The difference may be due to the fact that, in the study in arabidopsis, the branching  
383 phenotype was recorded as the number of branches at the end of the plant's life, whereas  
384 our study in rice captured branching at the beginning of the tiller development. Altogether,  
385 these results indicate that *D3* over-expression prevents sucrose from alleviating the inhibitory  
386 effect of SL on tillering and that *D14* over-expression promotes sucrose-induced tiller bud  
387 elongation.

388

389 **Strigolactone signalling mutants are less sensitive to low sucrose concentrations and remain**  
390 **responsive to sucrose.**

391 Our results suggest that the inhibition of tillering in response to low sucrose is due to high  
392 strigolactone signalling. If it holds true, the strigolactone signalling mutant *d14* and *d3* should

393 be less inhibited by low sucrose concentrations. We therefore tested this by measuring the  
394 response of the loss-of-function *d3* and *d14* mutants (Supplementary Figure S7) to different  
395 sucrose concentrations supplied hydroponically (Figure 6). The buds of the *d3* mutant  
396 responded more than the WT to low sucrose concentrations including 0% exogenous sucrose  
397 (Figure 6A,C,D). The buds of *d14* mutant also grew better on 0% sucrose than the WT.  
398 However, the length of *d14* tiller buds were much smaller than the buds of *d3*, and also  
399 showed enhanced growth on the difference sucrose concentrations, but this effect was not  
400 always significantly different from the WT and was always lower than *d3*. We could also  
401 observe that the buds of *d14* and *d3* mutants were still responsive to the increase in sucrose  
402 concentration. This observation is in line with our results showing that sucrose could promote  
403 D53 accumulation in a D3-independent manner in absence of exogeneous SL (Figure 4J).  
404 Altogether, these data indicate that disrupting SL signalling components, especially D3,  
405 decreases the sensitivity to low sucrose concentrations and that sucrose also promotes  
406 tillering independently of D14 and D3.

407

#### 408 ***RMS4/PsD3/PsMAX2* is involved in the sucrose-induced bud outgrowth in garden pea**

409 The role of sugars in bud release has been well described in garden pea, which is an  
410 established model eudicot for the study of shoot branching. In this species, decapitation  
411 triggers bud outgrowth through redistribution of sugars towards axillary buds, and sucrose  
412 feeding can trigger bud release (Mason *et al.*, 2014; Fichtner *et al.*, 2017). We explored  
413 whether a similar mechanism to what we observed in rice may occur in pea. To do so, we  
414 examined the expression of *PsD3* and *PsD14* in pea (also known as *RMS4/PsMAX2* and *RMS3*,  
415 respectively) as well as their downstream target *PsBRC1*, the pea orthologue of *TB1*, in  
416 response to sucrose feeding and decapitation (Figure 7). Similar to the strongly sucrose-  
417 responsive expression of *D3* and *TB1* in rice, decapitation led to a decrease in *PsD3* and  
418 *PsBRC1* expression but not in that of *PsD14* (Figure 7A-C). Additionally, compared with  
419 sorbitol used as an osmotic control, sucrose feeding for 4 hrs through the petiole strongly  
420 inhibited *PsD3* expression (70%) and, to a lesser extent, *PsD14* expression (50%) (Figure 7D).  
421 *PsBRC1* expression was also repressed by sucrose but not significantly, compared with  
422 sorbitol at this time point (Figure 7D). The downregulation of expression of the sugar-

423 repressible marker gene *PsDARK INDUCIBLE1 (PsDIN1)* (Fujiki *et al.*, 2001) indicates that the  
424 sucrose fed through the petiole reached the bud at 4 hrs. Altogether, these results support  
425 the hypothesis that *RMS4/PsD3/PsMAX2* is regulated by sucrose during bud outgrowth in  
426 pea, similar to that observed for *D3* in rice.

427 We then tested responsiveness to sucrose of the *d14* and *d3* mutants in pea, also known as  
428 *rms3* and *rms4*, respectively. To achieve this, we grew pea single nodes on half-strength MS  
429 media supplemented with different sucrose concentrations (Figure 7E). Decreasing sucrose  
430 concentration from 50 mM to 30 mM inhibited bud elongation of the WT plants. As observed  
431 in rice, buds of the *d3* mutant were not as sensitive as the WT to lower sucrose concentrations  
432 (30 mM). However, contrary to what we observed in rice, buds of the *d14* mutant were not  
433 significantly different from the WT. Altogether these results indicate that disruption of *D3*  
434 leads to a lower bud response to decreased sucrose availability.

435

## 436 **Discussion**

### 437 **Sucrose antagonises the inhibitory effect of strigolactones on tillering**

438 Sucrose and SL play a crucial role in shaping plant architecture through their antagonistic  
439 action on bud outgrowth, as previously demonstrated in dicotyledonous plants like rose, pea  
440 and chrysanthemum (Dierck *et al.*, 2016; Bertheloot *et al.*, 2020). In the present study, we  
441 demonstrated that sucrose also promotes tillering and inhibits the impact of SL on this  
442 process in monocotyledonous plants. In rice, as in the previously mentioned species, the  
443 inhibitory effect of SL on bud outgrowth was almost totally prevented by high sucrose  
444 concentrations. The inhibitory effect of sucrose on SL perception is not limited to shoot  
445 branching as reported by recent studies showing that sucrose can also alleviate the effect of  
446 SL on dark-induced leaf senescence in rice (Takahashi *et al.*, 2021) and bamboo (*Bambusa*  
447 *oldhamii*) (Tian *et al.*, 2018).

448 The expression of the TCP transcription factor *BRC1* that inhibits shoot branching (Takeda *et*  
449 *al.*, 2003; Aguilar-Martínez *et al.*, 2007; Braun *et al.*, 2012), has previously been reported to  
450 be repressed by sucrose in dicot species (Mason *et al.*, 2014; Barbier *et al.*, 2015b; González-  
451 Grandío *et al.*, 2017; Otori *et al.*, 2017; Wang *et al.*, 2019b). Our observations have

452 demonstrated that the expression of *TB1*, the *BRC1* homologue in monocots, is also repressed  
453 by sucrose in rice. Furthermore, D53 protein levels, which inhibit *TB1* gene expression, are  
454 increased by sucrose (Figure 2 A,D). Results in rice and *N. benthamiana* showed that SL-  
455 mediated D53 degradation was reduced by sucrose treatment (Figure 2 B,C; Supplementary  
456 Figure S5). This supports the hypothesis that the antagonistic effect of sucrose on SL-  
457 mediated bud inhibition (Dierck *et al.*, 2016; Bertheloot *et al.*, 2020) (Figure 1) is at least partly  
458 mediated through sucrose dampening SL-induced D53 degradation (Figure 8).

459

### 460 **D3/MAX2 plays a key role in the antagonism between sugar availability and strigolactones**

461 The F-box protein D3/RMS4/MAX2 plays an essential role in mediating the SL-dependent  
462 degradation of D53 protein through the SKP1–CULLIN–F-BOX (SCF) ubiquitin-proteasome  
463 system (Zhou *et al.*, 2013; Zhao *et al.*, 2014). Our data showed that over-expression of *D3*, but  
464 not of *D14*, prevented sucrose to antagonise the SL-induced D53 degradation and tillering  
465 inhibition (Figures 4 and 5), demonstrating the importance of D3 in modulating the tillering  
466 response to SL and sugar availability. In addition, the relative impact of sucrose on D53  
467 accumulation in presence of SL was much stronger in the WT than in the *d3* mutant (Figure  
468 4I), supporting this conclusion. As previously observed in sorghum, rose and arabidopsis  
469 (Kebrom *et al.*, 2010; Barbier *et al.*, 2015b, 2021), sugar availability suppresses *D3/MAX2* gene  
470 expression in rice and pea and this effect is stronger and more consistent than for *D14* (Figure  
471 3C, 3D and 7D). In addition, we did not observe a direct effect of sucrose on D3 protein levels  
472 (Figure 3F), showing that sucrose preferentially regulates *D3* transcription. However, sucrose  
473 might also act through D3 protein by regulating the switch between the two conformational  
474 states of this protein which has been reported to modulate the binding affinity between D3  
475 and D14 (Shabek *et al.*, 2018).

476 Some evidence suggest that D3/MAX2 may retain a function independent of SL. In field  
477 conditions, the *d3 (s2-215)* mutant (Patil *et al.*, 2019) showed a more severe dwarf and high  
478 tillering phenotype compared with the *d14 (htd-2)* mutant (Liu *et al.*, 2009), both being loss-  
479 of-function mutants developed from the same background (Nipponbare) (Supplementary  
480 figure S7). In both rice and pea buds, we could also observe this difference between *d14* and  
481 *d3* mutants, particularly under low sugar availability (Figure 6 and 7). This stronger impact of

482 *D3* mutation compared with *D14* mutation or SL-deficiency has been reported in different  
483 species and in different developmental processes (Umehara *et al.*, 2008; Hayward *et al.*,  
484 2009), showing that our observations are not due to a specific allele, and the difference  
485 between *D3* and *D14* mutations is conserved in diverse species. It was previously reported in  
486 arabidopsis, that over-expression of *MAX2* could partially suppress decapitation-induced  
487 branching in a SL-deficient background (Stirnberg *et al.*, 2007), supporting the hypothesis that  
488 *D3/MAX2* may retain a function independently of SL.

489 Besides mediating SL signalling, *D3/MAX2* has been shown to mediate the impact of karrikins  
490 in different developmental processes, including seed germination and root development  
491 (Nelson *et al.*, 2011; Waters *et al.*, 2012). However, karrikins have been reported to have no  
492 effect on shoot branching (Nelson *et al.*, 2011). It is therefore unlikely that the SL-independent  
493 effect of *D3/MAX2* on branching is dependent on karrikin signalling. Interestingly, *MAX2* was  
494 recently reported to be involved in CO<sub>2</sub> signalling in arabidopsis (Kalliola *et al.*, 2020). In  
495 addition, new proteins interacting with *MAX2* were recently discovered (Struk *et al.*, 2021),  
496 showing that the regulation of *MAX2* signalling is more complex than previously thought.  
497 Altogether, these observations have demonstrated that *D3/MAX2* is an important regulator  
498 in the antagonistic regulation of shoot branching and tillering by sugars and strigolactones  
499 (Figure 8).

500 The molecular mechanism through which sugars inhibit *D3/MAX2* expression is unknown.  
501 However, recent studies have highlighted that sugars regulate shoot branching through  
502 different sugar-signalling components such as Tre6P (Fichtner *et al.*, 2017, 2021a) and HXK1  
503 (Barbier *et al.*, 2021). Interestingly, it was shown that *MAX2* expression negatively correlates  
504 with *HXK1* expression and with sugar availability in arabidopsis (Barbier *et al.*, 2021).  
505 Moreover, *HXK1* deficiency leads to an upregulation of *MAX2* expression (Barbier *et al.*, 2021),  
506 suggesting that the *HXK1*-signalling pathways may be involved in sugar regulation of *MAX2*  
507 expression. However, *HXK1* signalling is specific to glucose, and our previous data suggests  
508 that a sucrose-specific signalling pathway was also involved in shoot branching (Barbier *et al.*,  
509 2015b). Since Tre6P has been shown to be a sucrose-specific signal (Fichtner & Lunn, 2021),  
510 it is reasonable to assume that this signalling component is also involved in the regulation of  
511 *MAX2* expression by sugars. In addition, other sugar signalling pathways have been shown to  
512 regulate *BRC1* expression via transcriptional (Wang *et al.*, 2021) and post-transcriptional

513 mechanisms (Wang *et al.*, 2019b). It is therefore possible that sugar-signalling mechanisms  
514 independent of HXK1 and Tre6P may also be involved in the regulation of *MAX2* expression.  
515 Future studies need to be done to understand how sugars regulate *MAX2* expression at the  
516 molecular level.

517

### 518 **Sucrose prevents SL-induced D53 and D14 degradation to promote tillering**

519 The transcriptional inhibition of *D3/MAX2* by sucrose in diverse plants suggests that the effect  
520 of sucrose on D53 may be mediated at least partly via *D3*. This hypothesis is strongly  
521 supported by the evidence that sucrose is able to alleviate GR24-mediated D53 degradation  
522 in a *D14* over-expressing line, but not in a *D3* over-expressing line (Figure 4 D, F). The inability  
523 of sucrose to alleviate LUC-D53 protein degradation when co-transfected with the *35Sp:OsD3*  
524 construct provides further supports that sucrose acts, at least partly, through D3 to regulate  
525 D53 (Figures 4H and 8; Supplementary Figure S5).

526 In addition to degradation of D53 protein, D3 is also responsible for SL-mediated degradation  
527 of D14 protein in rice (Hu *et al.*, 2017). We thus measured the effect of sucrose on HA-tagged  
528 D14 protein levels. In the absence of sucrose, GR24 completely degraded the D14 protein  
529 within 12 hrs, whereas in the presence of 4% sucrose, GR24 failed to degrade the D14 protein  
530 (Figure 3E). This result is important for two reasons. Firstly, it shows that the effect of sucrose  
531 on D53 protein levels could not be attributed to a negative effect of sucrose on D14 protein  
532 levels. Secondly, it suggests that the effect of sucrose on D53 is likely to be mediated by D3  
533 since protein accumulation pattern of D14 and D53 reflects what would be expected if *D3* was  
534 down-regulated (Hu *et al.*, 2017) (Figure 8). Contrary to the HA-D14 protein, sucrose did not  
535 show any positive or negative effect on HA-D3 protein levels, indicating sucrose acting  
536 through transcriptional regulation of *D3* rather than through regulation of D3 protein stability  
537 (Figure 3F).

538 Interestingly, we observed an over-accumulation of D53 protein in the *D14* over-expression  
539 line (Figure 4A-D, Supplementary Figure S8), which further led to increased sucrose-induced  
540 tillering in this line (Figure 5A-B). Considering the dual function of the D3 protein in  
541 modulating both SL-induced D53 and D14 protein degradation (Chevalier *et al.*, 2014;



542 Soundappan *et al.*, 2015; Wang *et al.*, 2015; Hu *et al.*, 2017), it can be hypothesised that there  
543 may be a competitive effect between D53 and D14 in binding to the D3 protein. Elevated D14  
544 protein levels in the *D14* over-expressing line would recruit more D3 protein, creating a deficit  
545 for D53 protein degradation. Whether and tillering remains to be determined. Interestingly,  
546 in pea, D14 was reported to be a mobile protein between root and shoot (Kameoka *et al.*,  
547 2016). In addition, D14 was reported to be highly abundant in the phloem in rice (Aki *et al.*,  
548 2008) and arabidopsis (Batailler *et al.*, 2012). Combined with our data, this suggests that the  
549 role of D14 in SL signalling is more complex than previously thought. More work is needed to  
550 test whether sucrose acts directly on D14 to increase its protein levels and increase D53 levels  
551 and to better understand the role of D14 in SL signalling.

552

### 553 **Sucrose also promotes tillering through a D3-independent pathway**

554 Our results also show that sucrose can increase D53 protein levels (Figure 4J) and inhibit *TB1*  
555 expression (Supplementary Figure S6) in the *d3* background, without addition of exogenous  
556 SL. In addition, bud elongation was also stimulated by sucrose in the *d3* background (Figure  
557 6I-J), showing that at least one other pathway, independent of D3, is involved in the sucrose-  
558 induced tillering. One straightforward explanation could be that the trophic properties of  
559 sucrose also play a role in inducing D53 accumulation and tillering. However, other  
560 hypotheses could also explain these observations. SL were reported to lead to the  
561 degradation of D14 by the same process as that leading to D53 degradation (Hu *et al.*, 2017).  
562 Our results also showed that sucrose prevents SL from degrading D14 (Figure 3E), which  
563 makes sense if sucrose prevents the degradation of D53 by inhibiting *D3* (see section above).  
564 This could also be explained by sucrose inhibiting the proteasome complex required for D3-  
565 dependent D14 and D53 degradation. We also showed that increasing D14 led to higher levels  
566 of D53 (Figure 4 A,D and Supplementary Figure S8). It could therefore be possible that sucrose  
567 prevents the SL-induced D14 degradation to promote D53 accumulation (Figure 8). This could  
568 be achieved by inhibiting the binding of SL to D14 or by preventing D3 from binding to D14.  
569 Recent findings in pea suggested that CK promotes PsSMXL7 protein accumulation, the  
570 homologue of the rice D53, through increasing the expression of *PsSMXL7* gene (Kerr *et al.*,  
571 2021). Since sucrose was reported to promote CK synthesis in different species (Barbier *et al.*,



572 2015b; Kiba *et al.*, 2019; Salam *et al.*, 2021), it would be tempting to hypothesise that sucrose  
573 induces D53 protein levels through a CK-mediated increase of *D53* expression. However, in  
574 our conditions, sucrose did not promote *D53* expression, and even decreased its transcription  
575 (Figure 3B), excluding this hypothesis.

576 Whether sucrose acts through D53 to regulate *TB1* expression independently of D3 remains  
577 to be determined (Figure 3A and Supplementary Figure S6). As mentioned above, sugar  
578 availability was reported to induce CK accumulation (Barbier *et al.*, 2015b; Kiba *et al.*, 2019;  
579 Salam *et al.*, 2021), and CK were reported to inhibit *BRC1* expression (Dun *et al.*, 2012; Roman  
580 *et al.*, 2016), which could explain our observations. It was also reported in rose calli, that  
581 sucrose regulates *TB1/BRC1* expression through specific elements on the 3'UTR of this gene  
582 (Wang *et al.*, 2019b), showing that sugars interact with SL signalling through multiple  
583 pathways. More studies are needed to understand the complete mechanism underpinning  
584 sugar-promoted tillering/branching and the interactions between SL and sugars.

585

## 586 **Conclusion**

587 The present study demonstrates that sugar availability and strigolactone signalling interact  
588 during the control of shoot branching, and that D3 plays a role in this interaction but that  
589 other pathways independent of D3 may also exist. In addition, our study shows that the  
590 protein levels of D14 and D3 impact tillering in opposite ways, which should prompt further  
591 studies to investigate the regulation of the components in the SL regulation of plant  
592 development. SL and sugars are systemic signals and their levels in plants are tightly regulated  
593 by environmental cues such as light, moisture and nutrient status (Yoneyama *et al.*, 2007;  
594 Yoneyama *et al.*, 2012; Lemoine *et al.*, 2013; Kapulnik & Koltai, 2014). Their interactions  
595 during the control of bud outgrowth therefore represents an important regulatory node in  
596 the control of plant architecture in response to the environment. Our study therefore  
597 provides an interesting opportunity to manipulate tillering and ultimately improve crop  
598 management and yields through molecular engineering and crop selection. Nonetheless,  
599 more work is needed to fully understand the mechanism(s) through which sucrose interact  
600 with D14, D3 and D53, and to better understand the unexpected promoting role of D14 in  
601 tillering.

602

603 **Acknowledgments:**

We would like to thank Catherine Rameau, Alexandre de Saint-Germain and Steven Smith for fruitful discussions about the manuscript. Work carried out in China was supported by grants from National Natural Science Foundation of China (31670279, 31271311 to Xueyong Li) and the Ministry of Agriculture of China (2016ZX08009-003 to Xueyong Li). SBP is a PhD scholar supported by the China Scholarship Council (CSC) & Ministry of Human Resource Development, Government of India. The work carried out in Australia was funded as part of a Researcher Development initiative and by the Australian Research Council (Georgina Sweet Laureate Fellowship FL180100139 to Prof. C. A. Beveridge).

604

605 **Supplementary Material:**

606 **Supplementary Table S1.** Primers used in RT-qPCR analysis.

607 **Supplementary Figure S1.** Effect of sucrose and sorbitol on tillering.

608 **Supplementary Figure S2.** Map of the vector used for the D53 protein degradation  
609 experiment performed on *Nicotiana benthamiana* leaves.

610 **Supplementary Figure S3.** Confirmation of gene expression of *OsD3* and *OsD14* in the  
611 corresponding overexpressing transgenic lines.

612 **Supplementary Figure S4.** Phenotypes of transgenic plants constitutively expressed with *D3*  
613 and *D14* under the control of *ACTIN1* promoter (ACTp).

614 **Supplementary Figure S5.** Effect of sucrose and GR24 on transiently expressed luciferase-D53  
615 protein alone and co-transfected with 35S-OsD3 protein in *Nicotiana benthamiana* leaves.

616 **Supplementary Figure S6.** *OsTB1* expression in the rice calli treated with different  
617 concentrations of sucrose for 24 hrs.

618 **Supplementary Figure S7.** Phenotypes of the *d3* and *d14* loss-of-function mutants in  
619 comparison with WT in the field condition.

620 **Supplementary Figure S8.** Comparative analysis of D53 protein levels in different  
621 backgrounds.

## 622 **References:**

- 623 **Aguilar-Martínez JA, Poza-Carrión C, Cubas P. 2007.** Arabidopsis BRANCHED1 acts as an integrator  
624 of branching signals within axillary buds. *The Plant Cell* **19**: 458–472.
- 625 **Aki T, Shigyo M, Nakano R, Yoneyama T, Yanagisawa S. 2008.** Nano Scale Proteomics Revealed the  
626 Presence of Regulatory Proteins Including Three FT-Like proteins in Phloem and Xylem Saps from  
627 Rice. *Plant and Cell Physiology* **49**: 767–790.
- 628 **Arite T, Umehara M, Ishikawa S, Hanada A, Maekawa M, Yamaguchi S, Kyojuka J. 2009.** *d14*, a  
629 strigolactone-insensitive mutant of rice, shows an accelerated outgrowth of tillers. *Plant Cell Physiol*  
630 **50**: 1416–1424.
- 631 **Barbier FF, Cao D, Fichtner F, Weiste C, Perez-Garcia M-D, Caradeuc M, Gourrierc JL, Sakr S,  
632 Beveridge CA. 2021.** HEXOKINASE1 signalling promotes shoot branching and interacts with cytokinin  
633 and strigolactone pathways. *New Phytologist* **231**: 1088–1104.
- 634 **Barbier FF, Chabikwa TG, Ahsan MU, Cook SE, Powell R, Tanurdzic M, Beveridge CA. 2019a.** A  
635 phenol/chloroform-free method to extract nucleic acids from recalcitrant, woody tropical species for  
636 gene expression and sequencing. *Plant Methods* **15**: 62.
- 637 **Barbier FF, Dun EA, Beveridge CA. 2017.** Apical dominance. *Current Biology* **27**: R864–R865.
- 638 **Barbier FF, Dun EA, Kerr SC, Chabikwa TG, Beveridge CA. 2019b.** An Update on the Signals  
639 Controlling Shoot Branching. *Trends in Plant Science* **24**: 220–236.
- 640 **Barbier FF, Lunn JE, Beveridge CA. 2015a.** Ready, steady, go! A sugar hit starts the race to shoot  
641 branching. *Current Opinion in Plant Biology* **25**: 39–45.
- 642 **Barbier F, Péron T, Lecerf M, Perez-Garcia M-D, Barrière Q, Rolčik J, Boutet-Mercey S, Citerne S,  
643 Lemoine R, Porcheron B, et al. 2015b.** Sucrose is an early modulator of the key hormonal  
644 mechanisms controlling bud outgrowth in *Rosa hybrida*. *Journal of Experimental Botany* **66**: 2569–  
645 2582.
- 646 **Batailler B, Lemaître T, Vilaine F, Sanchez C, Renard D, Cayla T, Beneteau J, Dinant S. 2012.** Soluble  
647 and filamentous proteins in Arabidopsis sieve elements. *Plant, Cell & Environment* **35**: 1258–1273.
- 648 **Bertheloot J, Barbier F, Boudon F, Perez-Garcia MD, Péron T, Citerne S, Dun E, Beveridge C, Godin  
649 C, Sakr S. 2020.** Sugar availability suppresses the auxin-induced strigolactone pathway to promote  
650 bud outgrowth. *New Phytologist* **225**: 866–879.
- 651 **Beveridge CA. 2000.** Long-distance signalling and a mutational analysis of branching in pea. *Plant  
652 Growth Regul* **32**: 193–203.
- 653 **Braun N, de Saint Germain A, Pillot JP, Boutet-Mercey S, Dalmais M, Antoniadis I, Li X, Maia-  
654 Grondard A, Le Signor C, Bouteiller N, et al. 2012.** The pea TCP transcription factor PsBRC1 acts  
655 downstream of strigolactones to control shoot branching. *Plant Physiol.* **158**: 225–238.
- 656 **Chen H, Zou Y, Shang Y, Lin H, Wang Y, Cai R, Tang X, Zhou J-M. 2008.** Firefly Luciferase  
657 Complementation Imaging Assay for Protein-Protein Interactions in Plants. *Plant Physiology* **146**:  
658 368–376.

- 659 **Chevalier F, Nieminen K, Sánchez-Ferrero JC, Rodríguez ML, Chagoyen M, Hardtke CS, Cubas P.**  
660 **2014.** Strigolactone Promotes Degradation of DWARF14, an  $\alpha/\beta$  Hydrolase Essential for Strigolactone  
661 Signaling in Arabidopsis. *The Plant Cell* **26**: 1134–1150.
- 662 **Cline MG. 1996.** Exogenous Auxin Effects on Lateral Bud Outgrowth in Decapitated Shoots. *Annals of*  
663 *Botany* **78**: 255–266.
- 664 **Dierck R, Dhooghe E, Van Huylbroeck J, De Riek J, De Keyser E, Van Der Straeten D. 2016.**  
665 Response to strigolactone treatment in chrysanthemum axillary buds is influenced by auxin  
666 transport inhibition and sucrose availability. *ACTA PHYSIOLOGIAE PLANTARUM* **38**: 271.
- 667 **Domagalska MA, Leyser O. 2011.** Signal integration in the control of shoot branching. *Nat. Rev. Mol.*  
668 *Cell Biol.* **12**: 211–221.
- 669 **Dun EA, de Saint Germain A, Rameau C, Beveridge CA. 2012.** Antagonistic action of strigolactone  
670 and cytokinin in bud outgrowth control. *Plant Physiol.* **158**: 487–498.
- 671 **Ferguson BJ, Beveridge CA. 2009.** Roles for Auxin, Cytokinin, and Strigolactone in Regulating Shoot  
672 Branching. *Plant Physiol.* **149**: 1929–1944.
- 673 **Fichtner F, Barbier FF, Annunziata MG, Feil R, Olas JJ, Mueller-Roeber B, Stitt M, Beveridge CA,**  
674 **Lunn JE. 2021a.** Regulation of shoot branching in arabidopsis by trehalose 6-phosphate. *New*  
675 *Phytologist* **229**: 2135–2151.
- 676 **Fichtner F, Barbier FF, Feil R, Watanabe M, Annunziata MG, Chabikwa TG, Höfgen R, Stitt M,**  
677 **Beveridge CA, Lunn JE. 2017.** Trehalose 6-phosphate is involved in triggering axillary bud outgrowth  
678 in garden pea (*Pisum sativum* L.). *The Plant Journal* **92**: 611–623.
- 679 **Fichtner F, Dissanayake IM, Lacombe B, Barbier F. 2021b.** Sugar and Nitrate Sensing: A Multi-Billion-  
680 Year Story. *Trends in Plant Science* **26**: 352–374.
- 681 **Fichtner F, Lunn JE. 2021.** The role of trehalose 6-phosphate (Tre6P) in plant metabolism and  
682 development. *Annual Review of Plant Biology* **72**.
- 683 **Fujiki Y, Yoshikawa Y, Sato T, Inada N, Ito M, Nishida I, Watanabe A. 2001.** Dark-inducible genes  
684 from Arabidopsis thaliana are associated with leaf senescence and repressed by sugars. *Physiologia*  
685 *Plantarum* **111**: 345–352.
- 686 **González-Grandío E, Pajoro A, Franco-Zorrilla JM, Tarancón C, Immink RGH, Cubas P. 2017.** Abscisic  
687 acid signaling is controlled by a BRANCHED1/HD-ZIP I cascade in Arabidopsis axillary buds.  
688 *Proceedings of the National Academy of Sciences* **114**: E245–E254.
- 689 **Guo W, Chen L, Herrera-Estrella L, Cao D, Tran L-SP. 2020.** Altering Plant Architecture to Improve  
690 Performance and Resistance. *Trends in Plant Science* **25**: 1154–1170.
- 691 **Hamiaux C, Drummond RSM, Janssen BJ, Ledger SE, Cooney JM, Newcomb RD, Snowden KC. 2012.**  
692 DAD2 Is an  $\alpha/\beta$  Hydrolase Likely to Be Involved in the Perception of the Plant Branching Hormone,  
693 Strigolactone. *Current Biology* **22**: 2032–2036.
- 694 **Hayashi H, Chino M. 1990.** Chemical Composition of Phloem Sap from the Uppermost Internode of  
695 the Rice Plant. *Plant and Cell Physiology* **31**: 247–251.

- 696 **Hayward A, Stirnberg P, Beveridge C, Leyser O. 2009.** Interactions between auxin and strigolactone  
697 in shoot branching control. *Plant Physiol* **151**: 400–12.
- 698 **Hu Q, He Y, Wang L, Liu S, Meng X, Liu G, Jing Y, Chen M, Song X, Jiang L, et al. 2017.** DWARF14, A  
699 Receptor Covalently Linked with the Active Form of Strigolactones, Undergoes Strigolactone-  
700 Dependent Degradation in Rice. *Frontiers in Plant Science* **8**.
- 701 **Jiang L, Liu X, Xiong G, Liu H, Chen F, Wang L, Meng X, Liu G, Yu H, Yuan Y, et al. 2013.** DWARF 53  
702 acts as a repressor of strigolactone signalling in rice. *Nature* **504**: 401–405.
- 703 **Kalliola M, Jakobson L, Davidsson P, Pennanen V, Waszczak C, Yarmolinsky D, Zamora O, Palva ET,  
704 Kariola T, Kollist H, et al. 2020.** Differential role of MAX2 and strigolactones in pathogen, ozone, and  
705 stomatal responses. *Plant Direct* **4**: e00206.
- 706 **Kameoka H, Dun EA, Lopez-Obando M, Brewer PB, de Saint Germain A, Rameau C, Beveridge CA,  
707 Kyojuka J. 2016.** Phloem transport of the receptor, DWARF14 protein, is required for full function of  
708 strigolactones. *Plant Physiol.* **172**: 1844–1852.
- 709 **Kebrom TH, Brutnell TP, Hays DB, Finlayson SA. 2010.** Vegetative axillary bud dormancy induced by  
710 shade and defoliation signals in the grasses. *Plant Signaling & Behavior* **5**: 317–319.
- 711 **Kebrom TH, Mullet JE. 2015.** Photosynthetic leaf area modulates tiller bud outgrowth in sorghum.  
712 *Plant, Cell & Environment* **38**: 1471–1478.
- 713 **Kerr SC, Patil SB, de Saint Germain A, Pillot J-P, Saffar J, Ligerot Y, Aubert G, Citerne S, Bellec Y,  
714 Dun EA, et al. 2021.** Integration of the SMXL/D53 strigolactone signalling repressors in the model of  
715 shoot branching regulation in *Pisum sativum*. *The Plant Journal* **107**: 1756–1770.
- 716 **Kiba T, Takebayashi Y, Kojima M, Sakakibara H. 2019.** Sugar-induced de novo cytokinin biosynthesis  
717 contributes to Arabidopsis growth under elevated CO<sub>2</sub>. *Scientific Reports* **9**: 1–15.
- 718 **Li H, Li J, Song J, Zhao B, Guo C, Wang B, Zhang Q, Wang J, King GJ, Liu K. 2019.** An auxin signaling  
719 gene BnaA3.IAA7 contributes to improved plant architecture and yield heterosis in rapeseed. *New  
720 Phytologist* **222**: 837–851.
- 721 **Liu W, Wu C, Fu Y, Hu G, Si H, Zhu L, Luan W, He Z, Sun Z. 2009.** Identification and characterization  
722 of HTD2: a novel gene negatively regulating tiller bud outgrowth in rice. *Planta* **230**: 649–58.
- 723 **Mason MG, Ross JJ, Babst BA, Wienclaw BN, Beveridge CA. 2014.** Sugar demand, not auxin, is the  
724 initial regulator of apical dominance. *Proceedings of the National Academy of Sciences* **111**: 6092–  
725 6097.
- 726 **Minakuchi K, Kameoka H, Yasuno N, Umehara M, Luo L, Kobayashi K, Hanada A, Ueno K, Asami T,  
727 Yamaguchi S, et al. 2010.** FINE CULM1 (FC1) works downstream of strigolactones to inhibit the  
728 outgrowth of axillary buds in rice. *Plant and Cell Physiology* **51**: 1127–1135.
- 729 **Moore B, Zhou L, Rolland F, Hall Q, Cheng W-H, Liu Y-X, Hwang I, Jones T, Sheen J. 2003.** Role of the  
730 Arabidopsis glucose sensor HXK1 in nutrient, light, and hormonal signaling. *Science (New York, N.Y.)*  
731 **300**: 332–336.
- 732 **Morris SE, Cox MCH, Ross JJ, Krisantini S, Beveridge CA. 2005.** Auxin dynamics after decapitation  
733 are not correlated with the initial growth of axillary buds. *Plant Physiol.* **138**: 1665–1672.

- 734 **Nelson DC, Scaffidi A, Dun EA, Waters MT, Flematti GR, Dixon KW, Beveridge CA, Ghisalberti EL,**  
735 **Smith SM. 2011.** F-box protein MAX2 has dual roles in karrikin and strigolactone signaling in  
736 *Arabidopsis thaliana*. *Proceedings of the National Academy of Sciences of the United States of*  
737 *America* **108**: 8897–8902.
- 738 **Otori K, Tamoi M, Tanabe N, Shigeoka S. 2017.** Enhancements in sucrose biosynthesis capacity  
739 affect shoot branching in *Arabidopsis*. *Bioscience, Biotechnology, and Biochemistry* **81**: 1470–1477.
- 740 **Patil S, Zafar SA, Uzair M, Zhao J, Fang J, Li X. 2019.** An Improved Mesocotyl Elongation Assay for the  
741 Rapid Identification and Characterization of Strigolactone-Related Rice Mutants. *Agronomy* **9**: 208.
- 742 **Rameau C, Bertheloot J, Leduc N, Andrieu B, Foucher F, Sakr S. 2015.** Multiple pathways regulate  
743 shoot branching. *Frontiers in Plant Science* **5**: 741.
- 744 **Rolland F, Baena-Gonzalez E, Sheen J. 2006.** Sugar sensing and signaling in plants: conserved and  
745 novel mechanisms. *Annual Review of Plant Biology* **57**: 675–709.
- 746 **Roman H, Girault T, Barbier F, Péron T, Brouard N, Pencik A, Novak O, Vian A, SAKR S, Lothier J, et**  
747 **al. 2016.** Cytokinins are initial targets of light in the control of bud outgrowth. *Plant Physiol.*
- 748 **Sakr S, Wang M, Dédaldéchamp F, Perez-Garcia M-D, Ogé L, Hamama L, Atanassova R. 2018.** The  
749 Sugar-Signaling Hub: Overview of Regulators and Interaction with the Hormonal and Metabolic  
750 Network. *International Journal of Molecular Sciences* **19**: 2506.
- 751 **Salam BB, Barbier F, Danieli R, Teper-Bamnlker P, Ziv C, Spíchal L, Aruchamy K, Shnaider Y,**  
752 **Leibman D, Shaya F, et al. 2021.** Sucrose promotes stem branching through cytokinin. *Plant*  
753 *Physiology* **185**: 1708–1721.
- 754 **Shabek N, Ticchiarelli F, Mao H, Hinds TR, Leyser O, Zheng N. 2018.** Structural plasticity of D3–D14  
755 ubiquitin ligase in strigolactone signalling. *Nature* **563**: 652–656.
- 756 **Soundappan I, Bennett T, Morffy N, Liang Y, Stanga JP, Abbas A, Leyser O, Nelson DC. 2015.**  
757 SMAX1-LIKE/D53 Family Members Enable Distinct MAX2-Dependent Responses to Strigolactones  
758 and Karrikins in *Arabidopsis*. *Plant Cell* **27**: 3143–59.
- 759 **Stirnberg P, Furner IJ, Ottoline Leyser HM. 2007.** MAX2 participates in an SCF complex which acts  
760 locally at the node to suppress shoot branching. *The Plant Journal: For Cell and Molecular Biology* **50**:  
761 80–94.
- 762 **Struk S, De Cuyper C, Jacobs A, Braem L, Walton A, De Keyser A, Depuydt S, Vu LD, De Smet I,**  
763 **Boyer F-D, et al. 2021.** Unraveling the MAX2 Protein Network in *Arabidopsis thaliana*: Identification  
764 of the Protein Phosphatase PAPP5 as a Novel MAX2 Interactor. *Molecular & Cellular Proteomics* **20**:  
765 100040.
- 766 **Sun Y, Zhao J, Patil SB, Fang J, Liu J, Li X. 2021.** Improved dual luciferase reporter (DLR) assay to  
767 determine the protein stability. *Analytical Biochemistry* **612**: 114021.
- 768 **Takahashi H, Imamura T, Konno N, Takeda T, Fujita K, Konishi T, Nishihara M, Uchimiya H. 2014.**  
769 The Gentio-Oligosaccharide Gentiobiose Functions in the Modulation of Bud Dormancy in the  
770 Herbaceous Perennial *Gentiana*[C][W]. *The Plant Cell* **26**: 3949–3963.
- 771 **Takahashi I, Jiang K, Asami T. 2021.** Counteractive Effects of Sugar and Strigolactone on Leaf  
772 Senescence of Rice in Darkness. *Agronomy* **11**: 1044.



- 773 **Takeda T, Suwa Y, Suzuki M, Kitano H, Ueguchi-Tanaka M, Ashikari M, Matsuoka M, Ueguchi C.**  
774 **2003.** The *OsTB1* gene negatively regulates lateral branching in rice. *The Plant Journal* **33**: 513–520.
- 775 **Tarancón C, González-Grandío E, Oliveros JC, Nicolas M, Cubas P. 2017.** A Conserved Carbon  
776 Starvation Response Underlies Bud Dormancy in Woody and Herbaceous Species. *Frontiers in Plant*  
777 *Science*.
- 778 **Thimann KV, Bonner J. 1933.** The mechanism of the action of the growth substance of plants. *Proc.*  
779 *R. Soc. Lond. B* **113**: 126–149.
- 780 **Tian M, Jiang K, Takahashi I, Li G. 2018.** Strigolactone-induced senescence of a bamboo leaf in the  
781 dark is alleviated by exogenous sugar. *Journal of Pesticide Science* **43**: 173–179.
- 782 **Umehara M, Hanada A, Yoshida S, Akiyama K, Arite T, Takeda-Kamiya N, Magome H, Kamiya Y,**  
783 **Shirasu K, Yoneyama K, et al. 2008.** Inhibition of shoot branching by new terpenoid plant hormones.  
784 *Nature* **455**: 195–200.
- 785 **Wang F, Han T, Song Q, Ye W, Song X, Chu J, Li J, Chen ZJ. 2020.** Rice Circadian Clock Regulates Tiller  
786 Growth and Panicle Development Through Strigolactone Signaling and Sugar Sensing. *The Plant Cell*.
- 787 **Wang M, Le Moigne M-A, Bertheloot J, Crespel L, Perez-Garcia M-D, Ogé L, Demotes-Mainard S,**  
788 **Hamama L, Davière J-M, Sakr S. 2019a.** BRANCHED1: A Key Hub of Shoot Branching. *Frontiers in*  
789 *Plant Science* **10**.
- 790 **Wang M, Ogé L, Voisine L, Perez-Garcia M-D, Jeauffre J, Hibrand Saint-Oyant L, Grappin P,**  
791 **Hamama L, Sakr S. 2019b.** Posttranscriptional Regulation of RhBRC1 (*Rosa hybrida* BRANCHED1) in  
792 Response to Sugars is Mediated via its Own 3' Untranslated Region, with a Potential Role of RhPUF4  
793 (Pumilio RNA-Binding Protein Family). *International Journal of Molecular Sciences* **20**: 3808.
- 794 **Wang M, Perez-Garcia M-D, Daviere J-M, Barbier F, Ogé L, Gentilhomme J, Voisine L, Peron T,**  
795 **Launay-Avon A, Clément G, et al. 2021.** Axillary bud outgrowth in rose is controlled by sugar  
796 metabolic and signalling pathways. *Journal of Experimental Botany* **72**: 3044–3060.
- 797 **Wang B, Smith SM, Li J. 2018.** Genetic Regulation of Shoot Architecture. *Annual Review of Plant*  
798 *Biology* **69**: 437–468.
- 799 **Wang L, Wang B, Jiang L, Liu X, Li X, Lu Z, Meng X, Wang Y, Smith SM, Li J. 2015.** Strigolactone  
800 Signaling in Arabidopsis Regulates Shoot Development by Targeting D53-Like SMXL Repressor  
801 Proteins for Ubiquitination and Degradation. *The Plant Cell* **27**: 3128–3142.
- 802 **Waters MT, Nelson DC, Scaffidi A, Flematti GR, Sun YK, Dixon KW, Smith SM. 2012.** Specialisation  
803 within the DWARF14 protein family confers distinct responses to karrikins and strigolactones in  
804 Arabidopsis. *Development (Cambridge, England)* **139**: 1285–1295.
- 805 **Zhao J, Wang T, Wang M, Liu Y, Yuan S, Gao Y, Yin L, Sun W, Peng L, Zhang W, et al. 2014.** DWARF3  
806 Participates in an SCF Complex and Associates with DWARF14 to Suppress Rice Shoot Branching.  
807 *Plant and Cell Physiology* **55**: 1096–1109.
- 808 **Zhou F, Lin Q, Zhu L, Ren Y, Zhou K, Shabek N, Wu F, Mao H, Dong W, Gan L, et al. 2013.** D14-  
809 SCFD3-dependent degradation of D53 regulates strigolactone signalling. *Nature* **504**: 406–410.

810



811 **Figures Legends:**

812

813 **Figure 1. Sucrose alleviates the inhibitory effect of GR24 on tiller bud outgrowth in rice. (A)**  
814 Representative tiller buds and **(B)** length of tiller buds of the WT (Huaidao 5) grown under  
815 different sucrose concentrations with or without 1  $\mu$ M GR24 for 3 weeks. Scale bar represents  
816 10 mm. Different lower-case letters denote significant differences ( $p < 0.05$ , one-way ANOVA  
817 following Tukey's test for multiple comparisons). Error bars represent  $\pm$  SE ( $n > 8$ ).

818

819 **Figure 2. Sucrose alleviates the GR24-induced D53 degradation. (A)** Western blot showing  
820 D53 protein accumulation in rice calli grown for 4 weeks on different sucrose concentrations.  
821 **(B)** D53 protein degradation in the WT rice calli initially grown on NB plates containing 4%  
822 sucrose and later shifted to liquid media with or without 4% sucrose containing 0.5  $\mu$ M GR24  
823 for different time points. **(C)** Transiently expressed luciferase-D53 protein in *Nicotiana*  
824 *benthamiana* leaves subjected to 1  $\mu$ M GR24 treatment with or without 4% sucrose for  
825 different time points. Luciferase readings were normalised with Renilla luciferase readings.  
826 Values are mean  $\pm$  SE ( $n = 4$ ). Different lower-case letters denote significant differences  
827 ( $p < 0.05$ , one-way ANOVA following Tukey's test for multiple comparisons) **(D)** Western blot  
828 showing D53 accumulation in isolated tillers buds (< 3 mm length) of 3-month-old rice  
829 (Nipponbare) plants treated with or without 4 % sucrose for 1 hour. Numbers in italics below  
830 the blots indicate the relative band intensity of D53 normalized by the intensity of Actin or  
831 HSP82 bands.

832

833 **Figure 3. Sucrose down-regulates key genes in the SL signalling pathway. (A)** Effect of  
834 different sucrose concentrations on the expression of *TB1*, **(B)** *D53*, **(C)** *D14* and **(D)** *D3* in the  
835 callus (grown for three weeks), shoot base tissues (three weeks old plants), and isolated tiller  
836 buds (<3 mm length) of two-month-old rice plants grown hydroponically with different  
837 sucrose concentrations for 24 hrs. Values are mean  $\pm$  SE ( $n = 3$ ). Each replicate consists of 8  
838 biologically independent samples. Significant levels: \*  $p < 0.05$ , \*\*  $p < 0.01$ ; indicated by  
839 Student's *t*-Test. **(E)** Effect of sucrose on GR24-mediated degradation of HA-tagged D14 fused

840 protein levels detected by immunoblotting with an anti-HA tag monoclonal antibody. (F)  
841 Effect of sucrose on GR24-mediated degradation of HA-tagged D3 fused protein levels  
842 detected by immunoblotting with an anti-HA tag monoclonal antibody. Numbers in italics  
843 below the blots indicate the relative band intensity of D14 or D3 normalized by the intensity  
844 of Actin or HSP82 bands.

845

846 **Figure 4. Over-expression of *D3*, but not *D14*, leads to D53 degradation in the presence of**  
847 **sucrose. (A)** Effect of sucrose (4%) on D53 accumulation at different time points in WT and  
848 *D14* over-expressing line, and (B) WT and *D3* over-expressing line detected by  
849 immunoblotting with an anti-D53 polyclonal antibody. (C) Effect of sucrose on D53  
850 degradation in the calli of WT (GSOR300192), (D) *D14* over-expressing line, (E) WT  
851 (GSOR300002), and (F) *D3* over-expressing line initially grown on NB plates containing 4%  
852 sucrose and later shifted to liquid media with or without 4% sucrose containing 0.5  $\mu$ M GR24  
853 for different time points detected by immunoblotting with an anti-D53 polyclonal antibody.  
854 (G) Effect of sucrose on *Nicotiana benthamiana* MAX2 (*NbMAX2*) expression in *Nicotiana*  
855 *benthamiana* leaves infiltrated with or without sucrose solution (4%) at different time points.  
856 Values are mean  $\pm$  SE (n=3). (H) Transiently expressed luciferase-D53 protein alone and co-  
857 transfected with 35S-OsD3 protein in *N. benthamiana* leaves subjected to 1  $\mu$ M GR24  
858 treatment with or without 4% sucrose for different time points. Luciferase readings were  
859 normalised with renilla luciferase readings. Values are mean  $\pm$  SE (n = 3). Significant levels:  
860 \*\*p < 0.01; indicated by Student's *t*-Test. (I) D53 accumulation in rice in WT and *d3* mutant  
861 calli grown NB plates containing 4% sucrose and later shifted to liquid media with 0.5  $\mu$ M  
862 GR24 and a range of sucrose concentrations for 10 min. (J) D53 accumulation in rice in WT  
863 and *d3* mutant calli continuously grown on different sucrose concentrations for 6 weeks  
864 without exogenous GR24. Numbers in italics below the blots indicate the relative band  
865 intensity of D53 normalized by the intensity of Actin or HSP82 bands.

866

867 **Figure 5. *D3* over-expression prevents sucrose from inhibiting the SL-induced tillering**  
868 **suppression. (A)** Effect of sucrose on tiller bud elongation in the WT (GSOR300192), (B) *D14*  
869 over-expression line, (C) WT (GSOR300002) and (D) *D3* over-expressing line grown with or

870 without 1  $\mu$ M GR24 for 3 weeks. Values are mean  $\pm$  SE (n = 10). Significant levels: \*\*\*p <  
871 0.001; \*\*p < 0.01, \*p < 0.05; indicated by Student's t-Test.

872

873 **Figure 6. Growth of rice tiller buds in response to different sucrose concentrations. (A)**  
874 Representative images of tiller buds of WT (Nipponbare), **(B)** SL signalling mutants *d14* (*htd-*  
875 *2*) and **(C)** *d3* (*S2-215*) grown on different sucrose concentrations for three weeks. (Scale bar=  
876 1 mm). Arrowhead represents tiller bud used for measurement. **(D)** Tiller bud outgrowth  
877 (mm) in the WT (Nipponbare), *d14* (*htd-2*) and *d3* (*s2-215*) grown under the different sucrose  
878 concentrations for three weeks. Different lower-case letters denote significant differences,  
879 p<0.05, one-way ANOVA following Tukey's test for multiple comparisons (compared for each  
880 sucrose concentration separately). Error bars represent  $\pm$ SE (n > 8).

881

882 **Figure 7. Effect of sucrose and decapitation on bud elongation and expression of SL pathway**  
883 **genes in pea buds. (A)** Effect of decapitation on gene expression of *PsD14*, **(B)** *PsD3* (*RMS4*)  
884 and **(C)** *BRC1* (*PsTB1*) at different time points in response to decapitation. Values are mean  $\pm$   
885 SE (n = 3 pools of 20 buds). **(D)** Expression of SL signalling genes in axillary buds fed with  
886 sucrose or sorbitol (osmotic control) through the petiole for 4h. Values are mean  $\pm$  SE (n = 3  
887 pools of 20 buds). Each replicate consists of 8 individual samples. Significant levels: \*\*\*p <  
888 0.001; \*\*p < 0.01 indicated by Student's t-Test. **(E)** Length of single-node pea buds of WT  
889 (*Terese*), *Psd14* (*rms3*) and *Psd3* (*rms4*) mutants grown *in vitro* with 30, 50 and 70 mM sucrose  
890 for 6 days. Different lower-case letters denote significant differences at each concentration  
891 (p<0.05, one-way ANOVA following Tukey's test for multiple comparisons). Error bars  
892 represent  $\pm$  SE (n = 8 individual buds).

893

894 **Figure 8. Proposed model of the interaction between sucrose and SL pathway.** In absence  
895 of SL, D53 is not targeted by D14 and D3 and triggers tillering, although a residual SL-  
896 independent effect of D3 on D53 may exist. In presence of SL, a complex is formed between  
897 D14, D3 and D53, leading to the rapid degradation of D14 and D53, inhibiting tillering. In  
898 presence of SL and sugars, sugars repress *D3*, thus preventing the SL-induced D14 and D53

899 degradation and triggering tillering. Sugars also prevent the SL-induced D53 degradation  
900 through a D3-independent pathway and trigger a D14-dependent induction of D53  
901 accumulation. The mechanism through which D14 promotes D53 accumulation remains  
902 unknown (hypotheses are given in the discussion).

## Figure 1

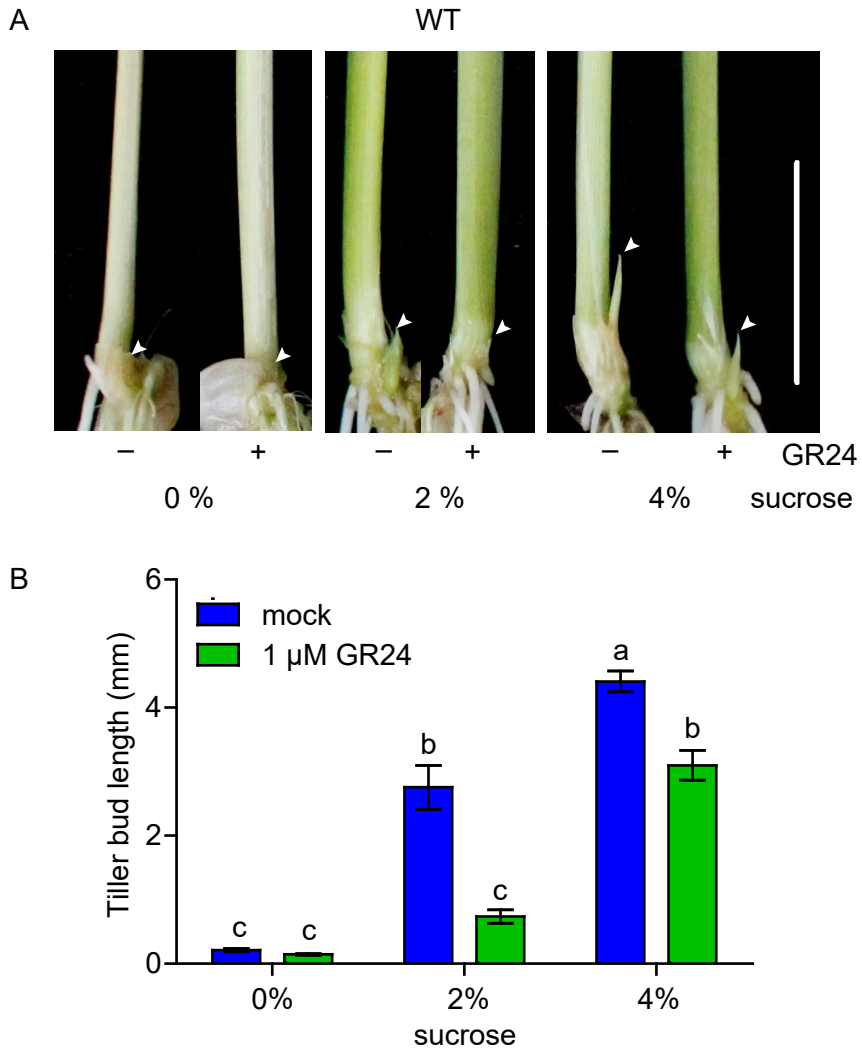

## Figure 2

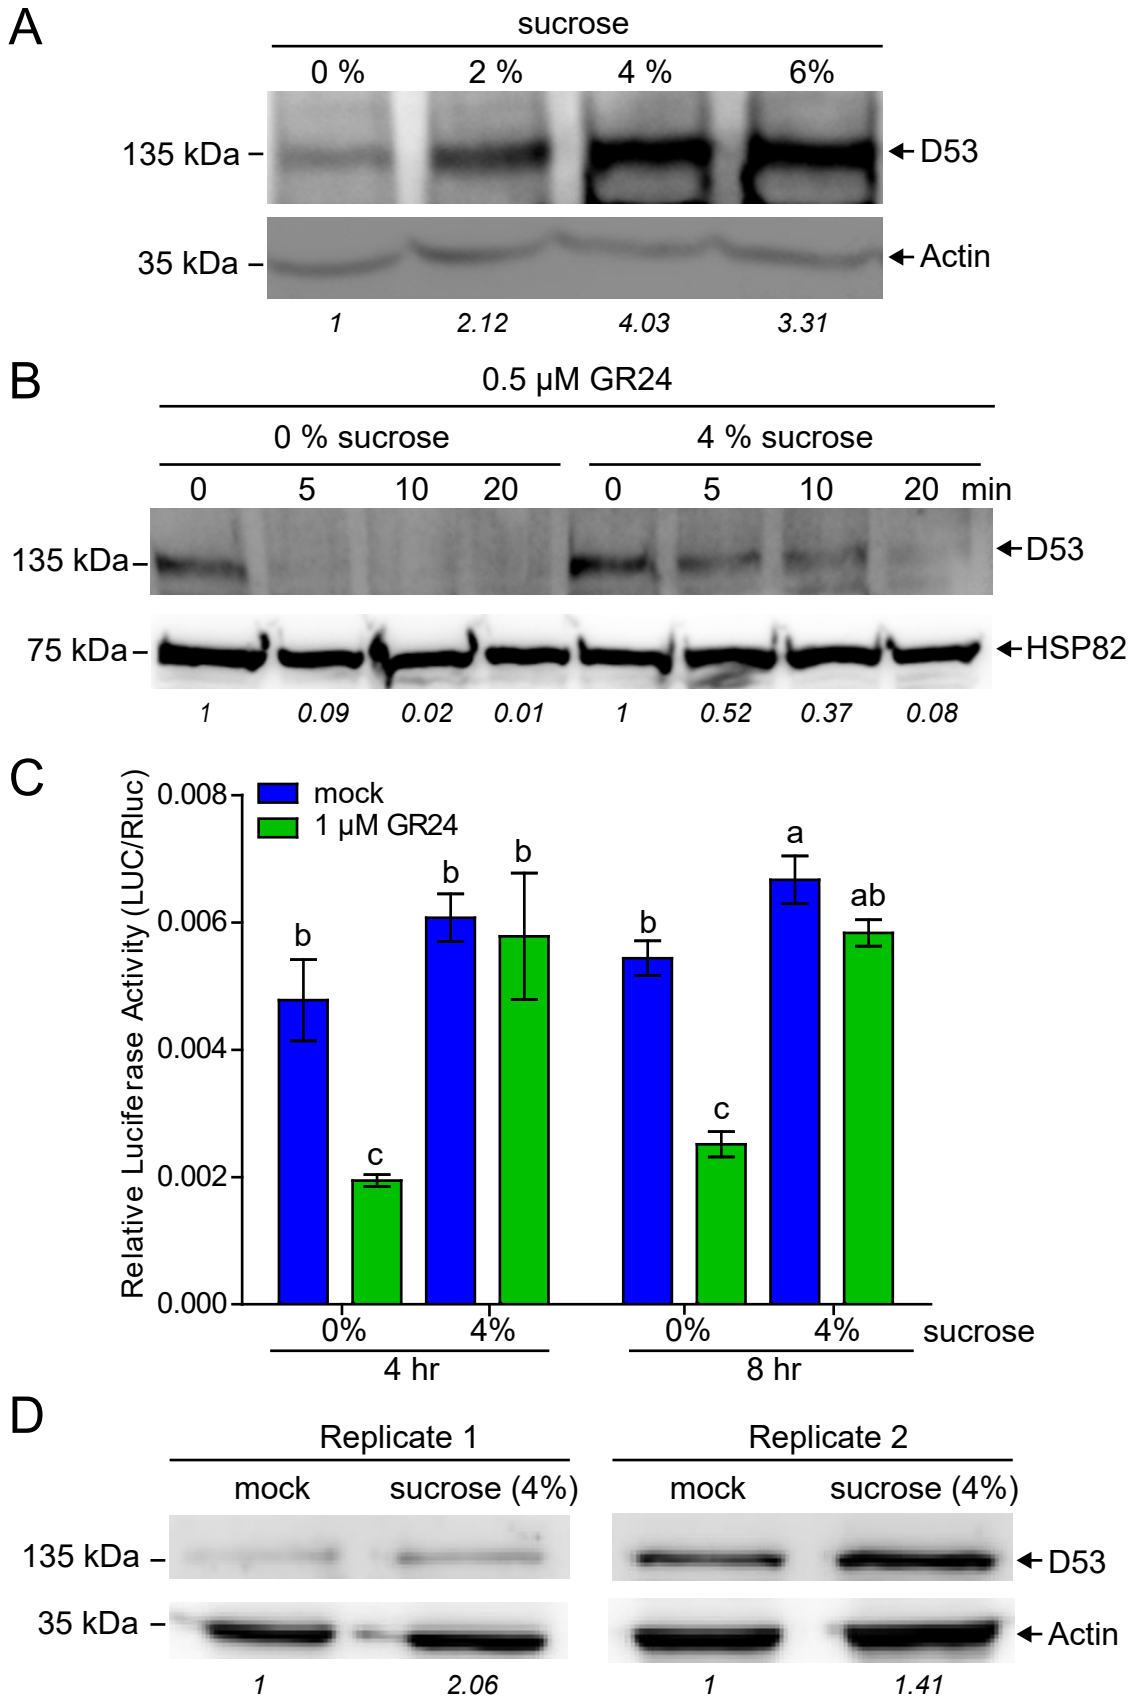

Figure 3

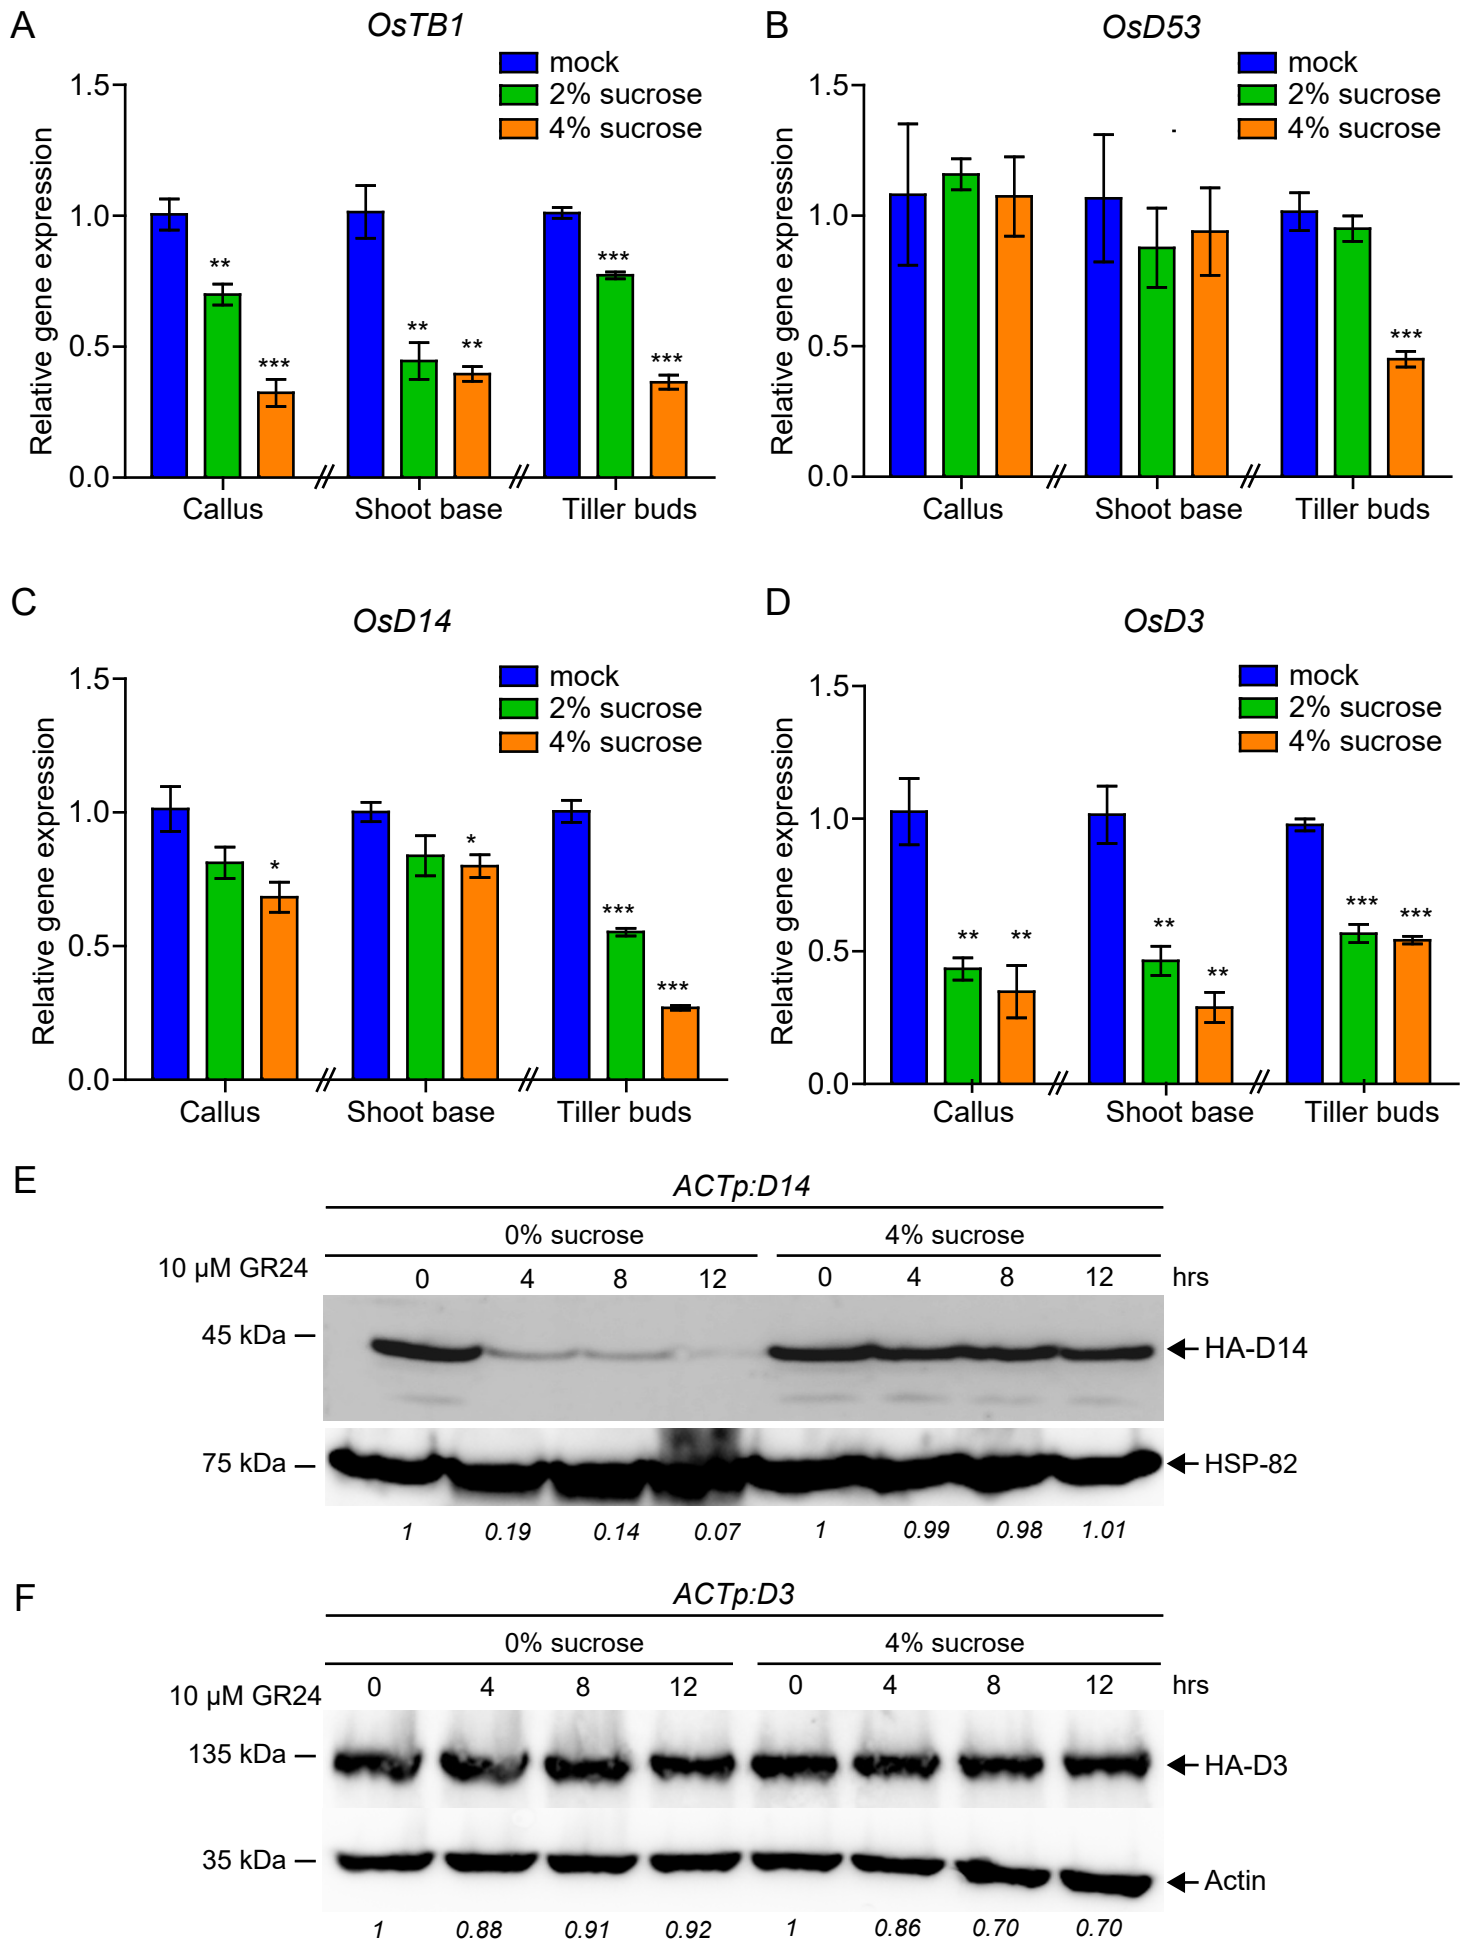

## Figure 4

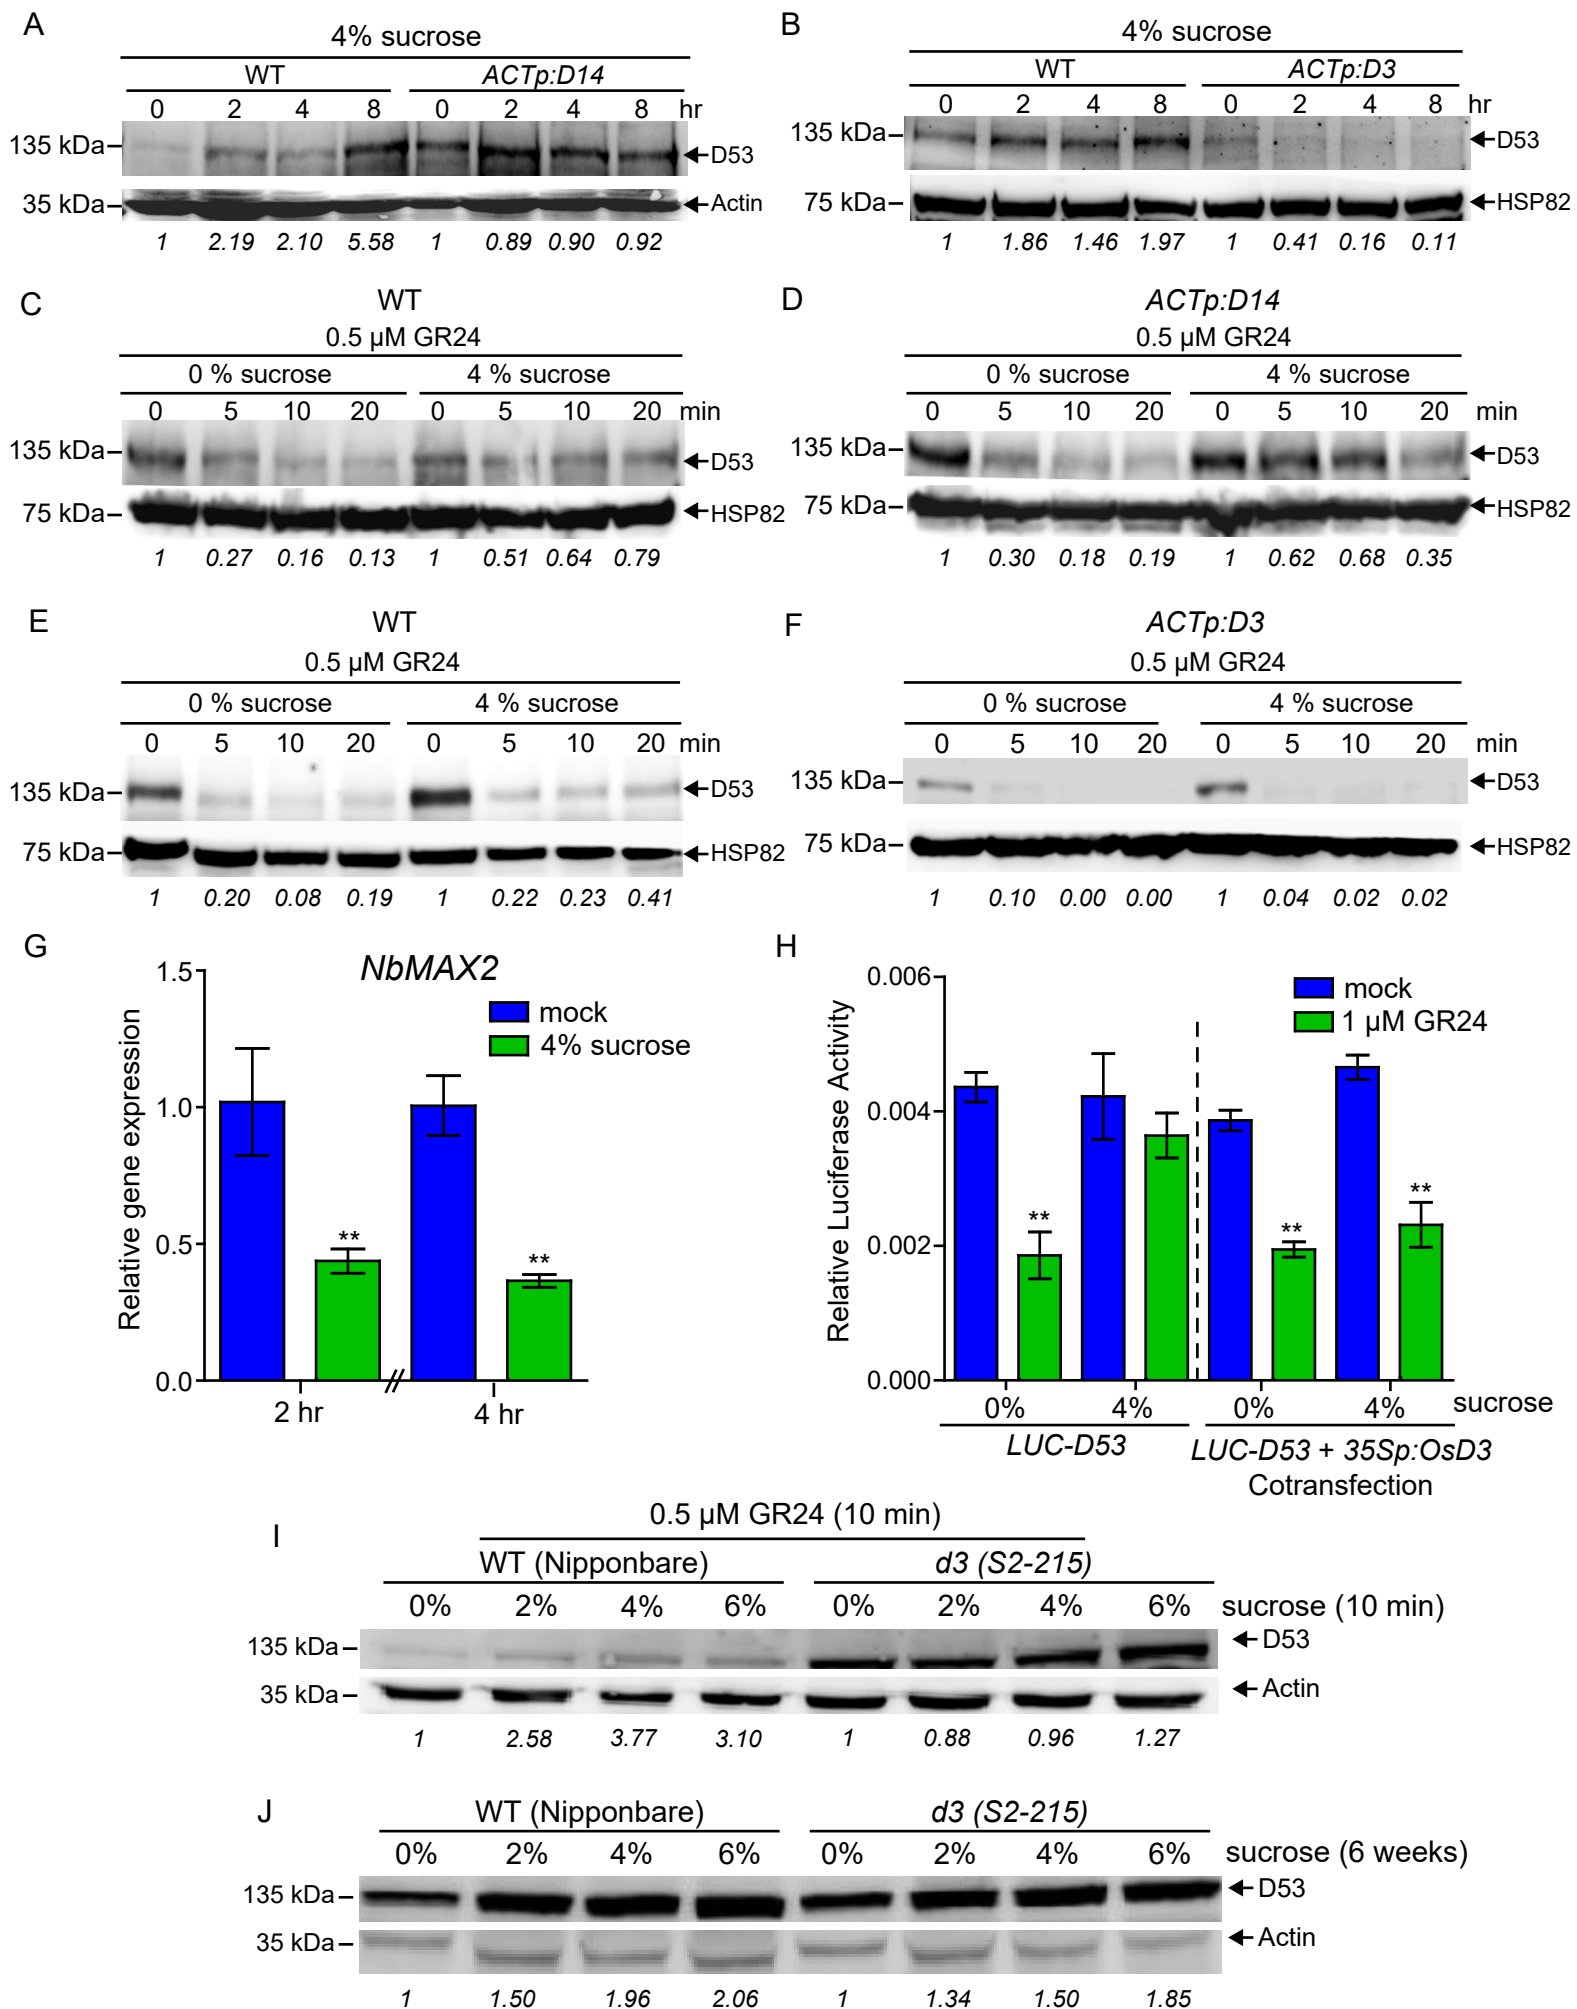



Figure 5

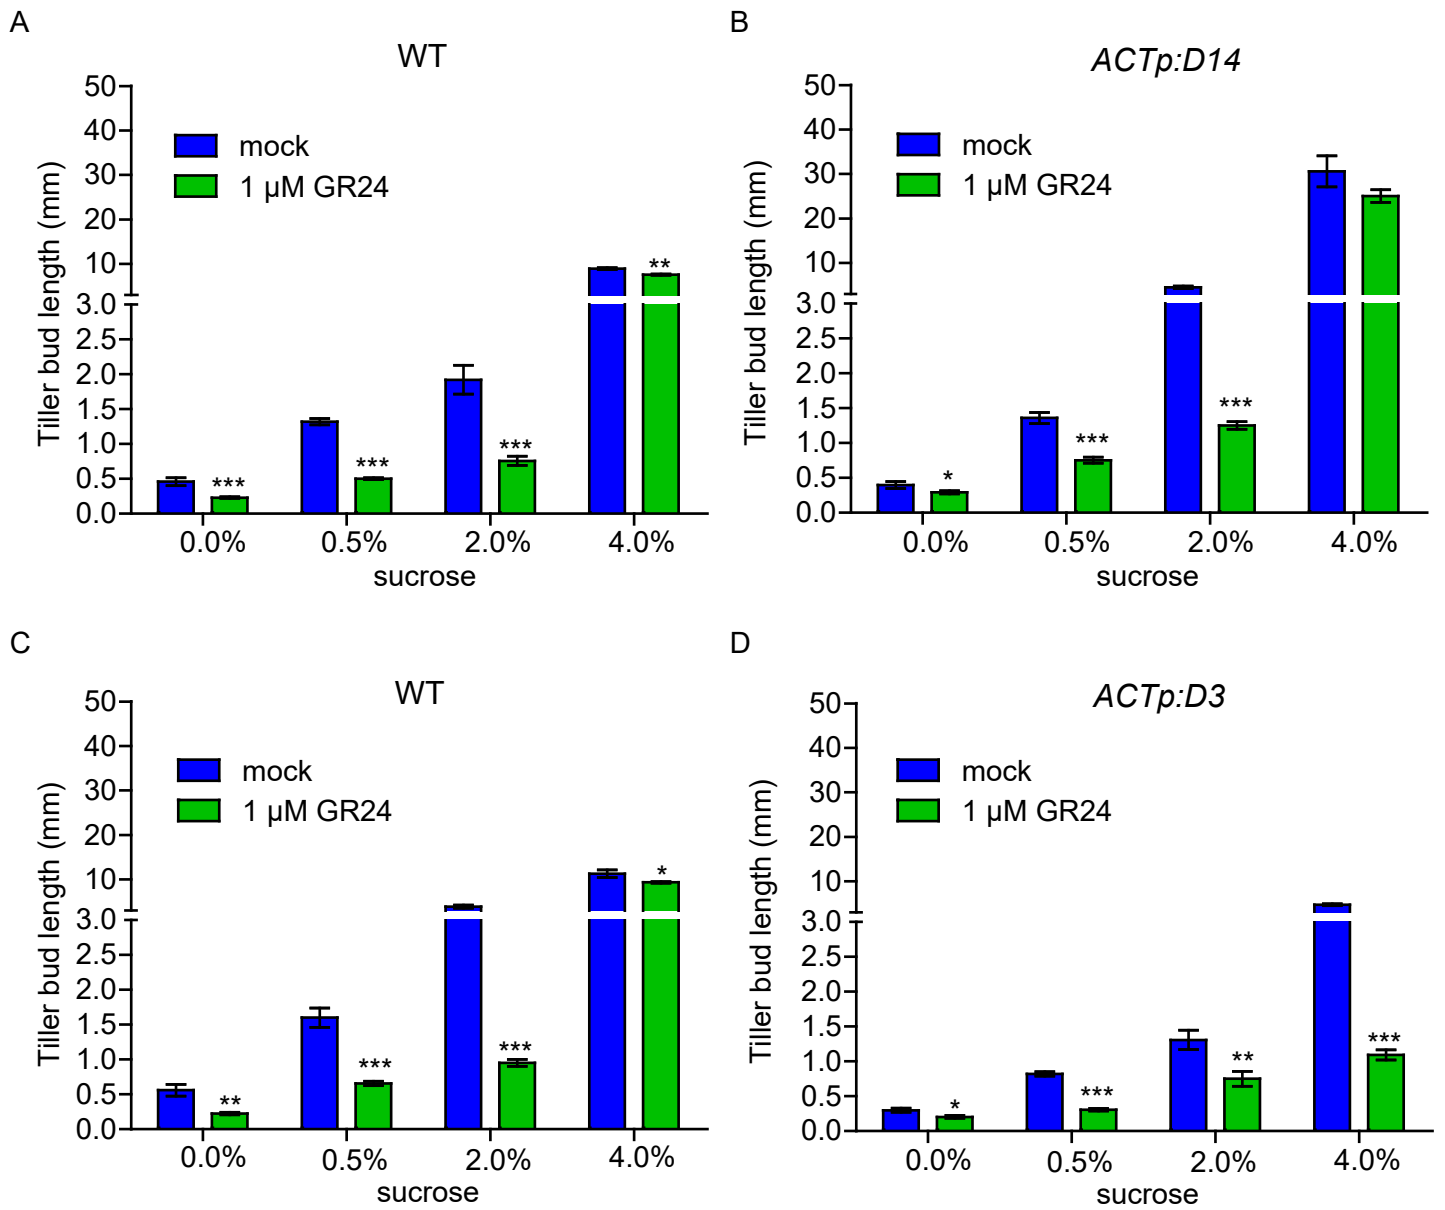

## Figure 6

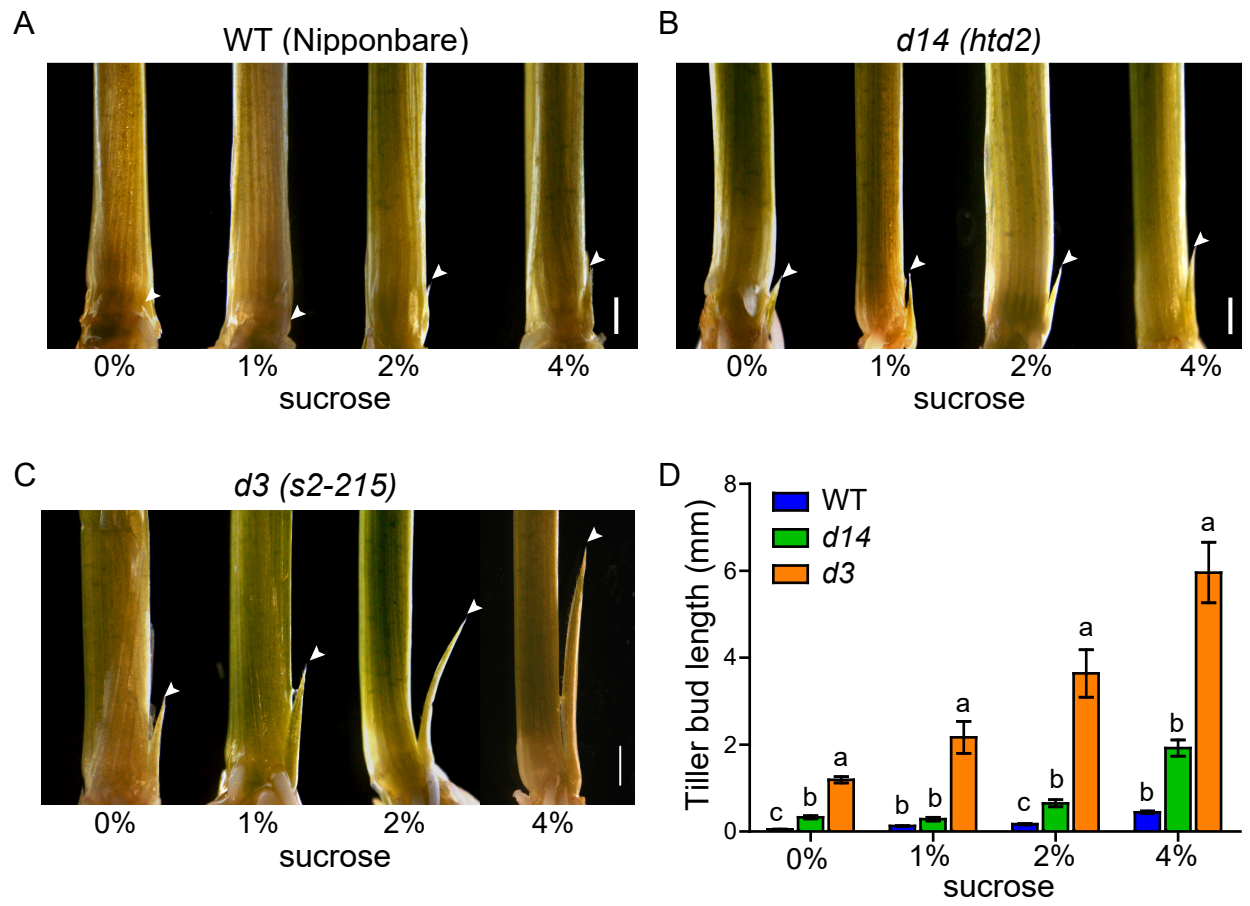

Figure 7

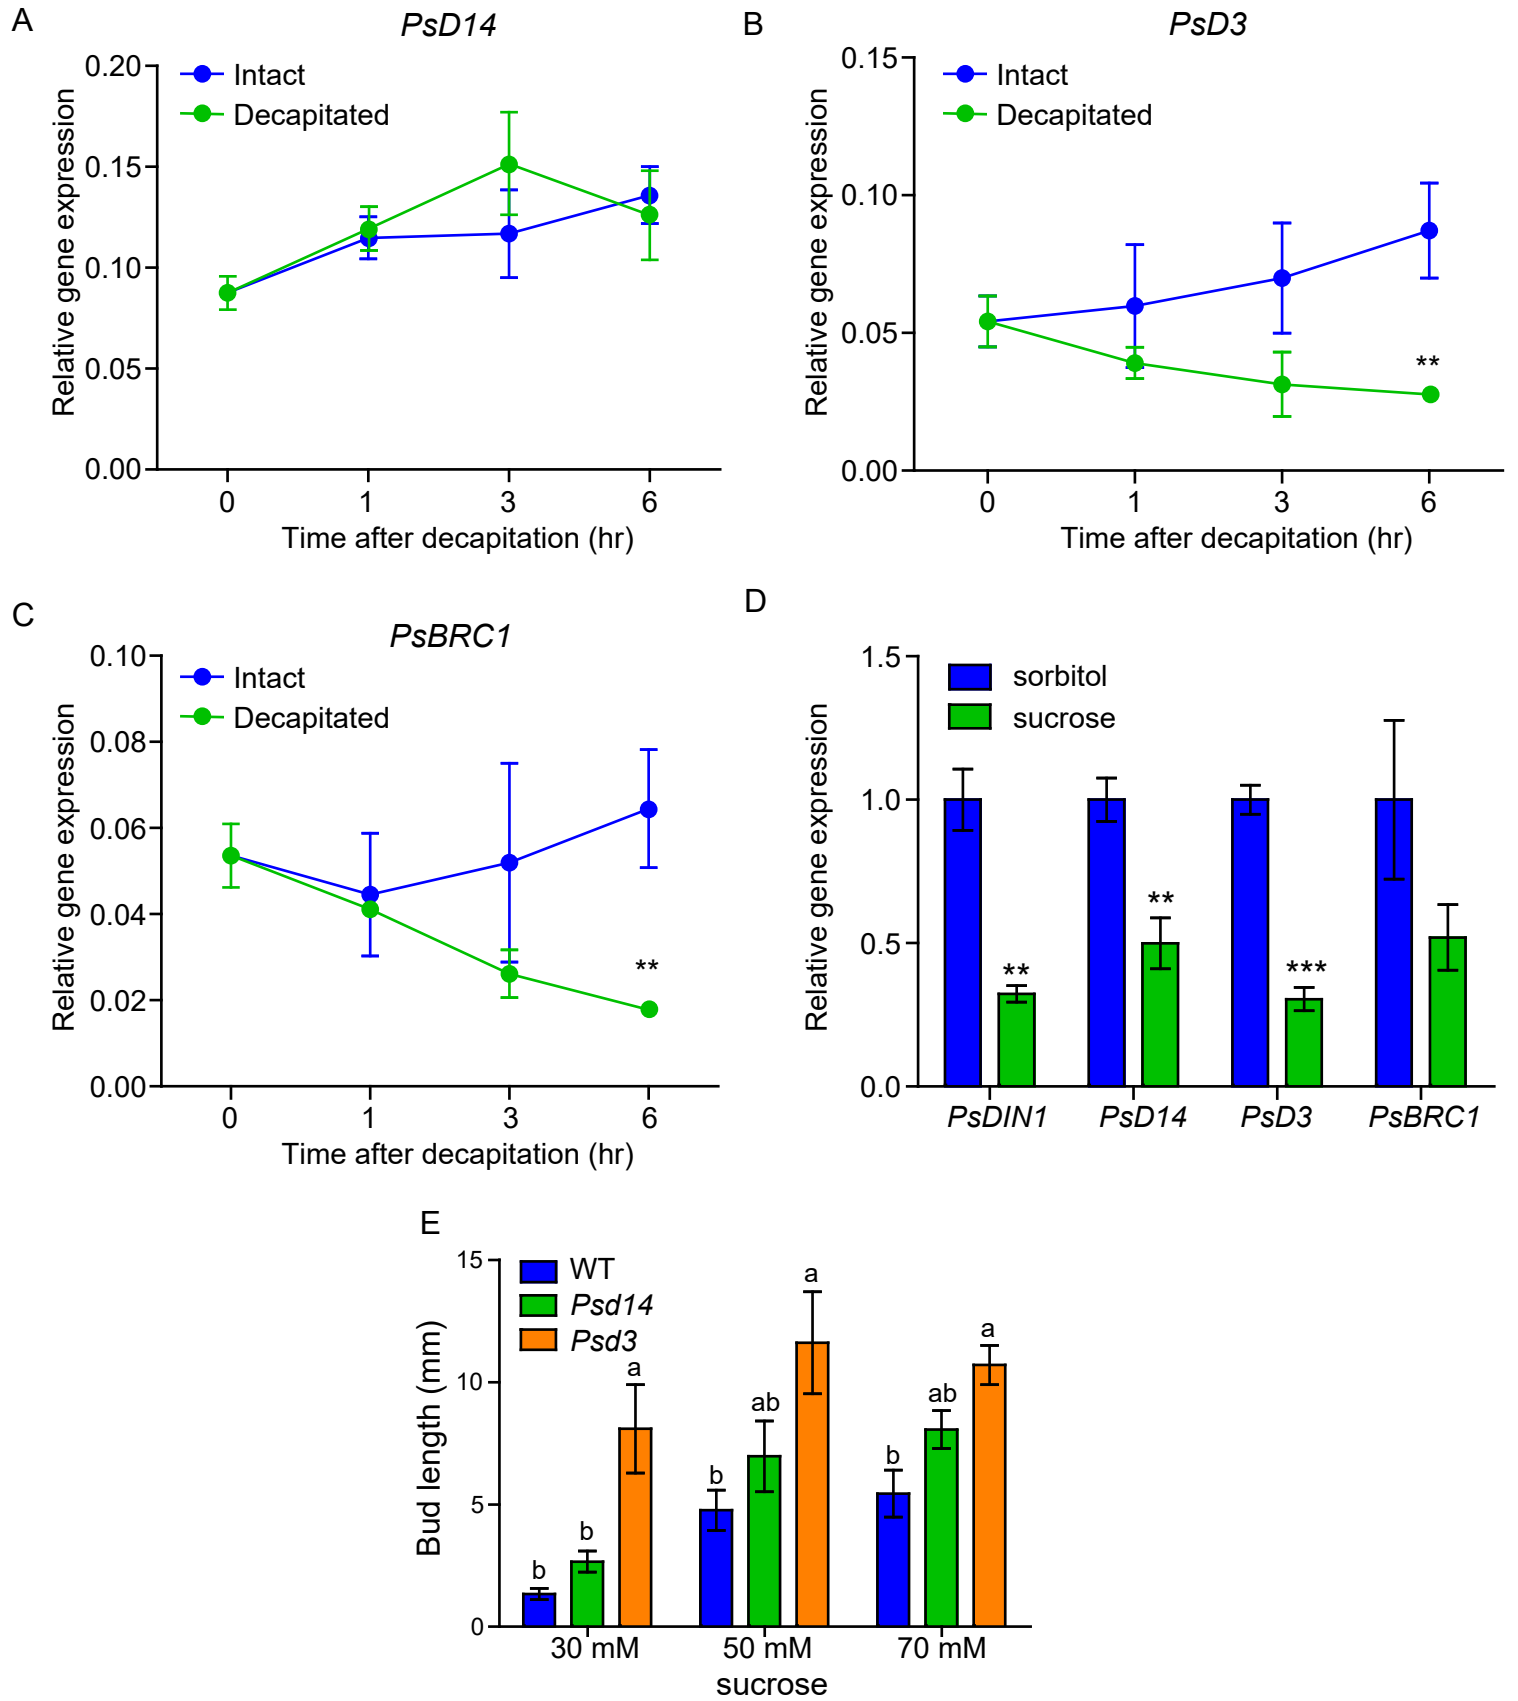

Figure 8

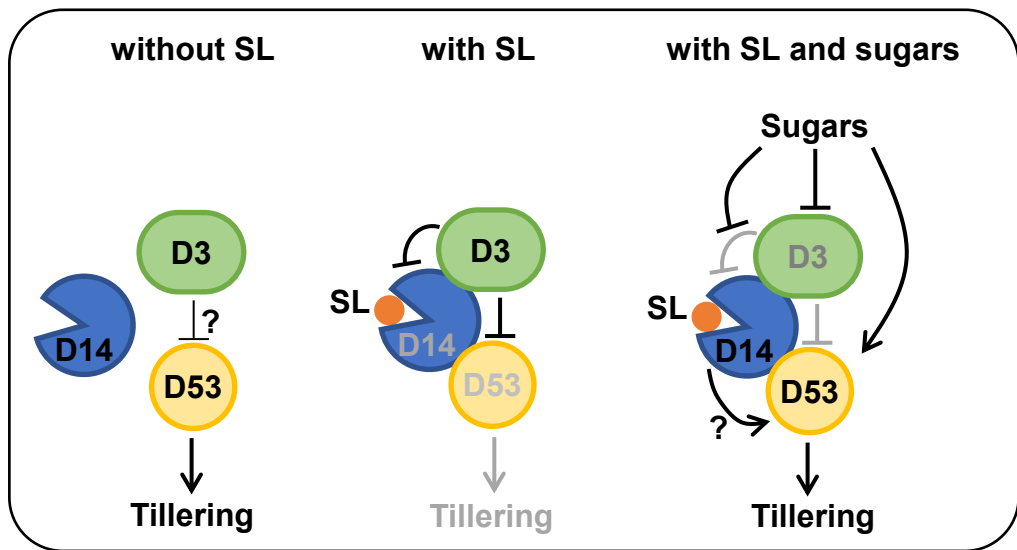

## Supplementary Table 1

**Supplementary Table S1.** Primers used in RT-qPCR analysis

| Sr. No | Gene          | Forward primer (5'-3') | Reverse primer (5'-3') |
|--------|---------------|------------------------|------------------------|
| 1      | <i>OsD3</i>   | GGAACACCTCGACCTCTCGCTC | GAAGGCGTTCTGCTCGGAGATC |
| 2      | <i>OsD14</i>  | GTGCTGTCGCATGGCTTC     | GCAGGTCGTCGACGTAGG     |
| 3      | <i>OsTB1</i>  | CGACAGCGGCAGCTACTAC    | GCGAATTGGCGTAGACGA     |
| 4      | <i>OsD53</i>  | CAACTATCATTAGCGCAAGTG  | GTTGATCCTCTGGTGGTCTTGG |
| 5      | <i>NbMAX2</i> | TAATTGCAGGAGTGCGAGTG   | TGGCATAGAAATGCCATGAA   |

## Supplementary Figure S1

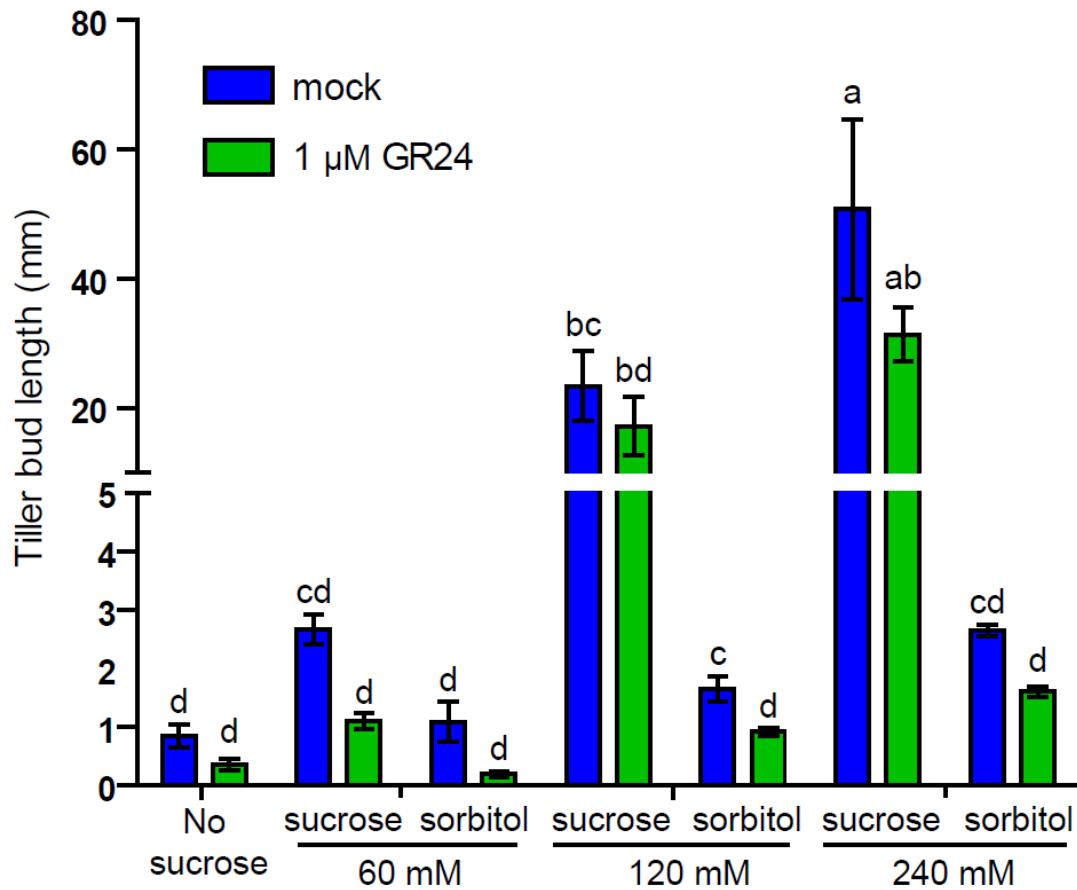

**Supplementary Figure S1. Effect of sucrose and sorbitol on tillering.** Length of tiller buds from rice plants fed hydroponically with different sucrose and sorbitol concentrations [No sucrose, 2% (~60 mM), 4% (~120 mM) and 8% (~240 mM)] with or without 1 μM GR24. Different lower case letters denote significant differences,  $p < 0.05$ , one-way ANOVA following Tukey's test for multiple comparisons. Error bars represent  $\pm$  SE ( $n > 8$ ).

## Supplementary Figure S2

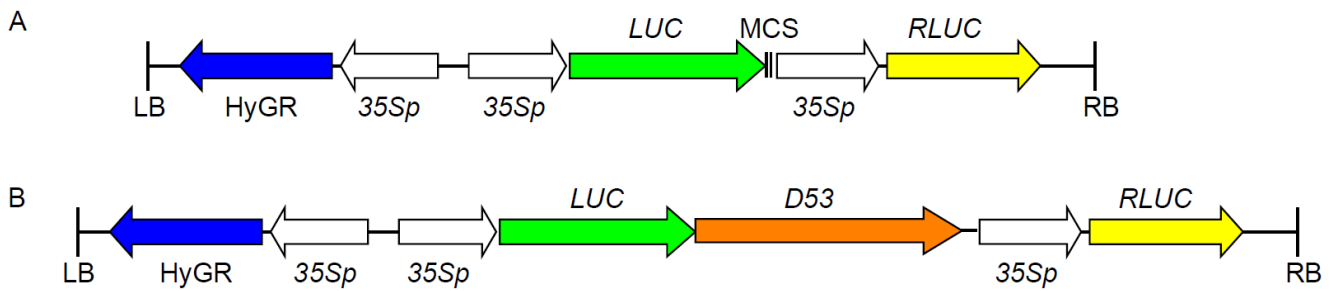

**Supplementary Figure S2. Map of the vector used for the D53 protein degradation experiment performed in tobacco leaves. (A)** Original vector (pCAMBIA 1200-R-LUC) consisting of the Fire fly luciferase and Renilla luciferase sequence driven by the CaMV 35S promoter. **(B)** The vector with the D53 protein fused at the C-terminal end of the Fire fly luciferase coding sequence driven by the CaMV 35S promoter in addition to the Renilla luciferase gene driven by the CaMV 35S promoter.



## Supplementary Figure S3

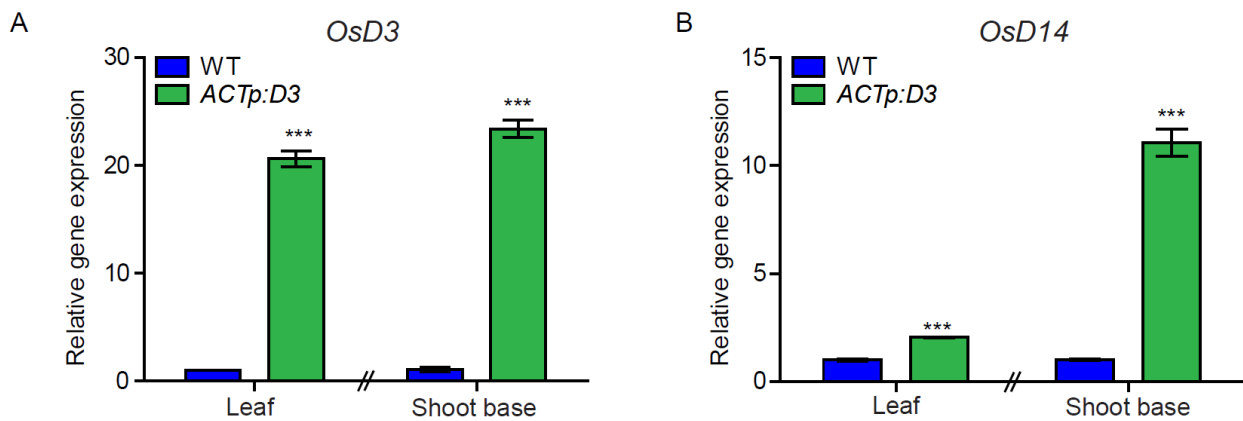

**Supplementary Figure S3. Confirmation of gene expression of *OsD3* and *OsD14* in the corresponding overexpressing transgenic lines.** Two-week-old rice seedlings were used to detect the expression of *OsD3* in the WT (GSOR300192), and *ACTp:D3* (*D3* over-expression line B11-15) and *OsD14* expression in the WT (GSOR300192) and *ACTp:D14* (*D14* over expression line B8-14). Significant levels (Compared to the WT), \*\*\* $p < 0.001$  indicated by Student's t-Test.

## Supplementary Figure S4

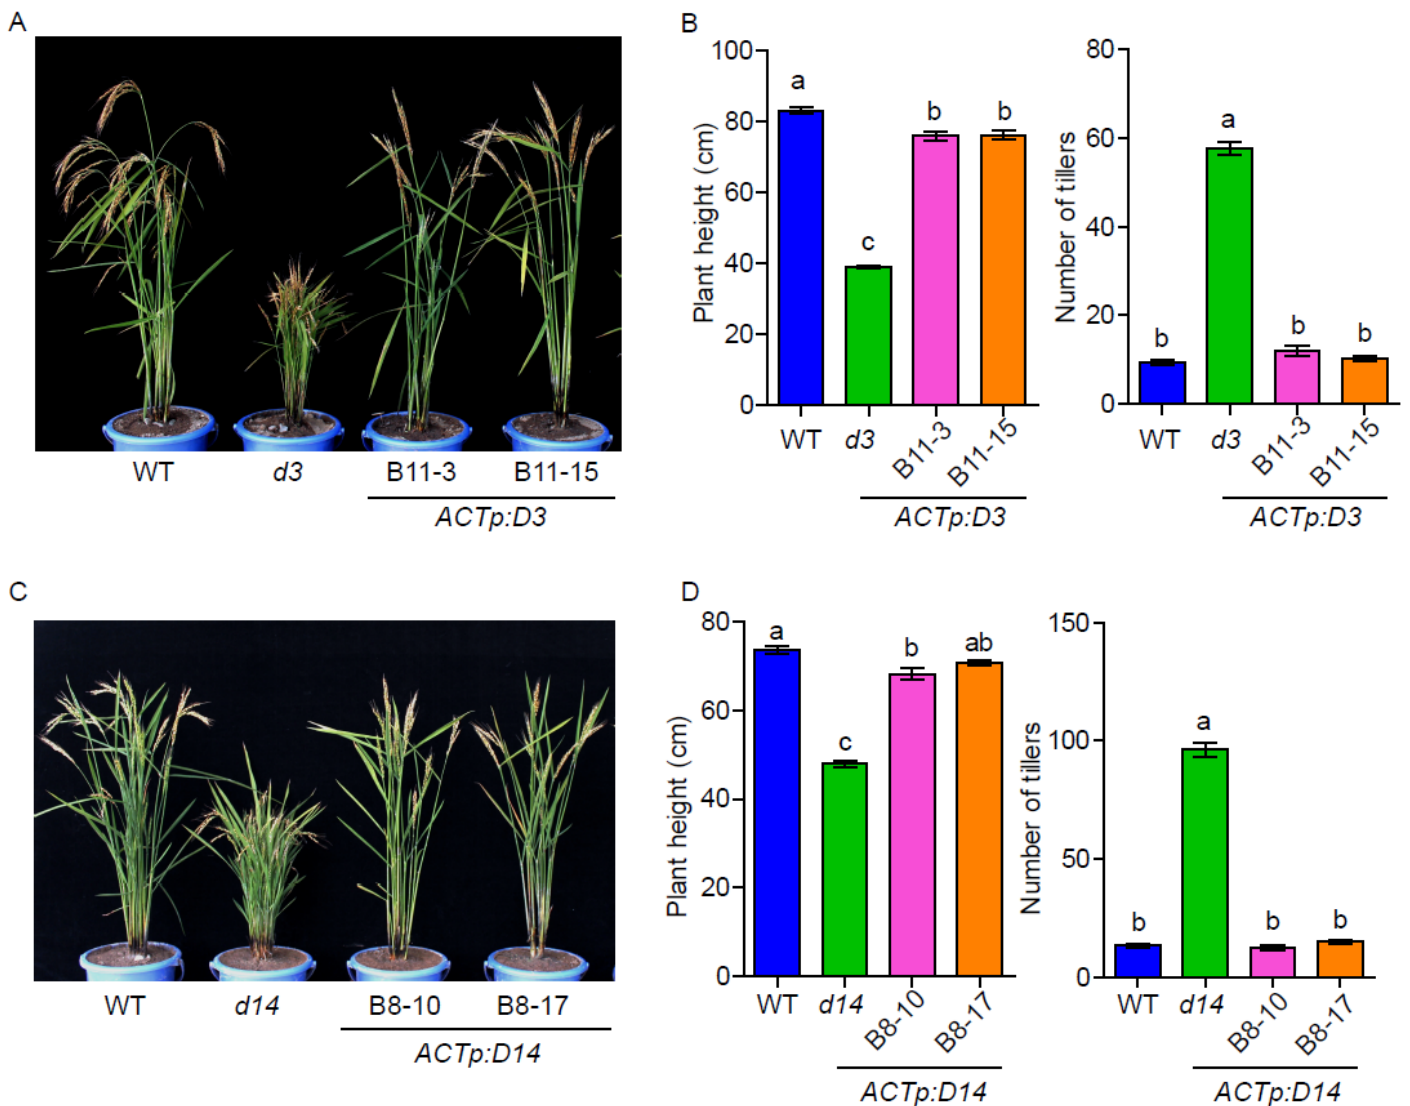

**Supplementary Figure S4. Phenotypes of the *d3* and *d14* loss-of-function mutants in comparison with WT in the field condition.** (A) Phenotypes of WT (GSOR300192), *d3* (*gsor300097*) and *ACTp:D3* transgenic plants at maturity stage in field condition. (B) Plant height (cm) and tiller numbers of the Phenotypes of WT (GSOR300192), *d3* (*gsor300097*) and *ACTp:D3* transgenic lines at maturity stage in the field condition. Values are mean  $\pm$ SE (n=20). (C) Phenotypes of WT (GSOR300192), *d14* (*gsor300183*) and *ACTp:D14* transgenic plants at maturity stage in field condition. (D) Plant height (cm) and tiller numbers of the WT (GSOR300192), *d14* (*gsor300183*) and *ACTp:D14* transgenic lines at maturity stage in the field condition. Different lower case letters denote significant differences ( $p < 0.05$ , one-way ANOVA following Tukey's test for multiple comparisons). Error bars represent  $\pm$  SE (n=20).

## Supplementary Figure S5

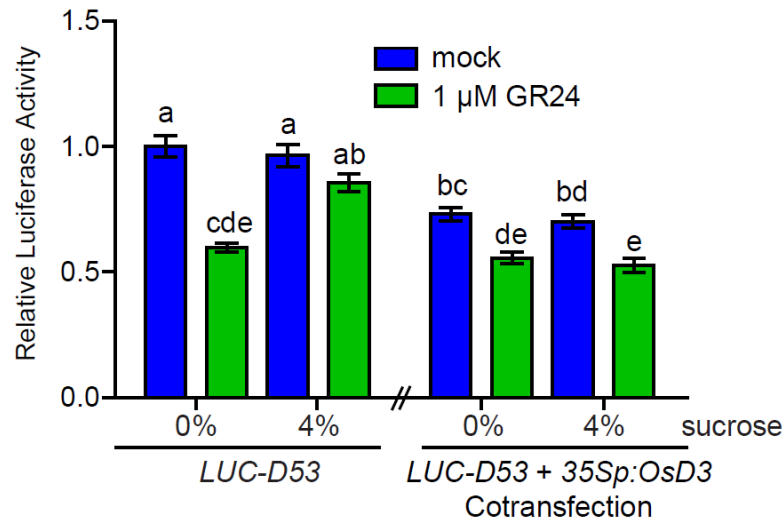

**Supplementary Figure S5. Effect of sucrose and GR24 on transiently expressed luciferase-D53 protein alone and co-transfected with 35S-OsD3 protein in *Nicotiana benthamiana* leaves.** Luciferase readings were normalised with renilla luciferase readings. Different lower-case letters denote significant differences ( $p < 0.05$ , one-way ANOVA following Tukey's test for multiple comparisons). Error bars represent  $\pm$  SE (n=6).

## Supplementary Figure S6

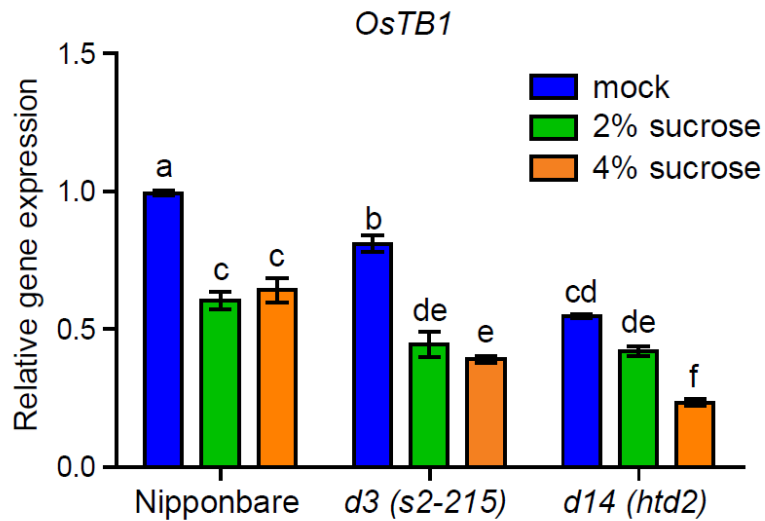

**Supplementary Figure S6. *OsTB1* expression in the rice calli treated with different concentrations of sucrose for 24 hrs.** Different lower-case letters denote significant differences ( $p < 0.05$ , one-way ANOVA following Tukey's test for multiple comparisons). Error bars represent  $\pm$  SE ( $n=6$ ).

## Supplementary Figure S7

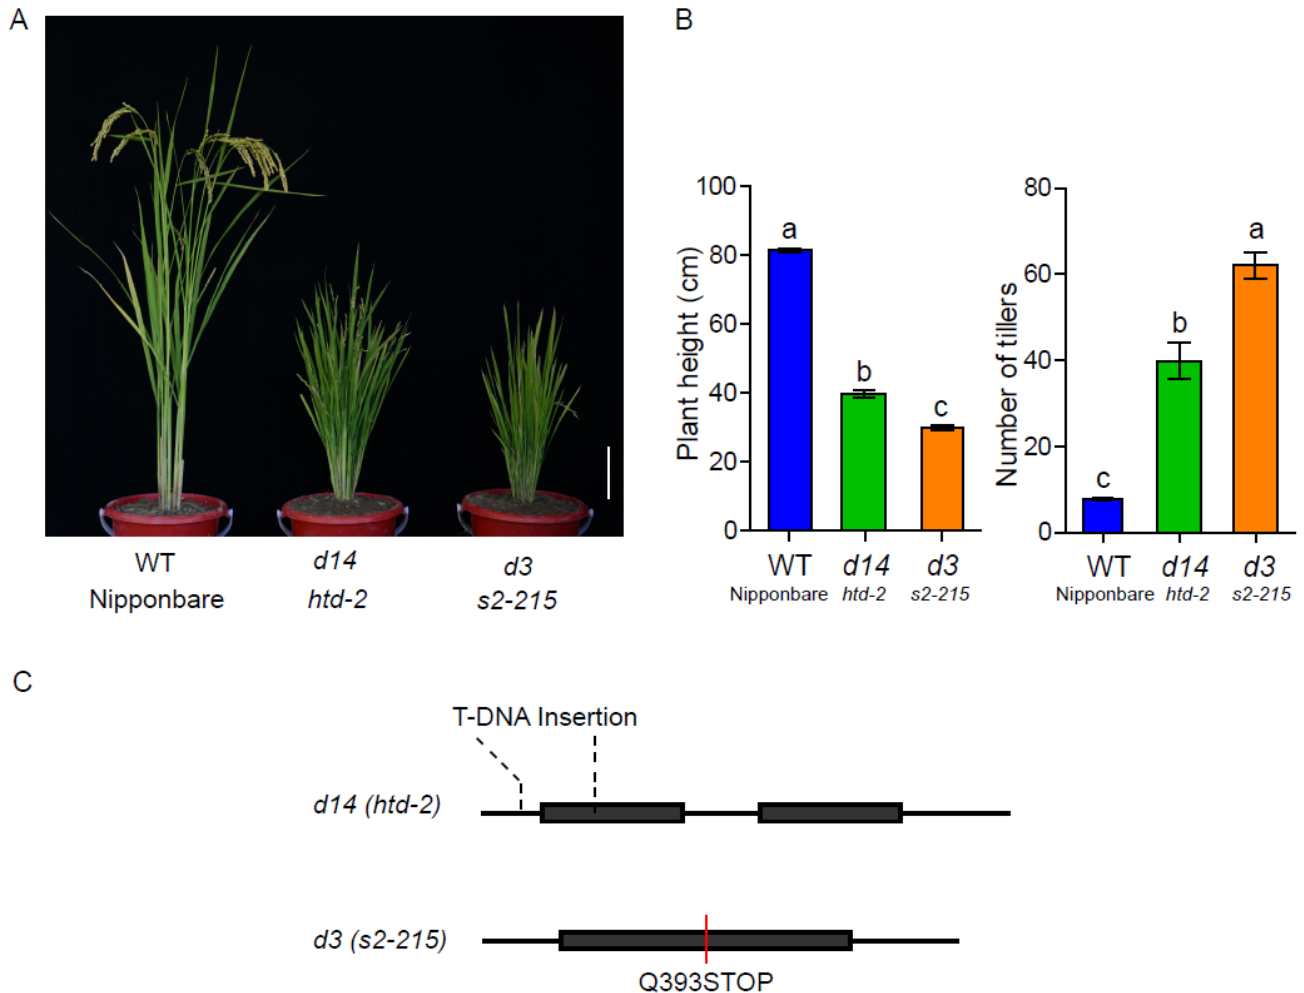

**Supplementary Figure S7. Phenotypes of the *d3* and *d14* loss-of-function mutants in comparison with WT in the field condition. (A)** Phenotypes of WT (Nipponbare), *d14* (*htd-2*) and *d3* (*s2-215*) mutants grown in the field condition. Scale bar=5 cm. **(B)** Plant height (cm) and tiller number of WT, *d14* and *d3* grown in the field condition. Different lower case letters denote significant differences ( $p < 0.05$ , one-way ANOVA following Tukey's test for multiple comparisons). Error bars represent  $\pm$  SE ( $n = 8$ ). **(C)** Mutation points of *d14* (*htd2*) and *d3* (*s2-215*) in the gene structure (black boxes represent exon and black line represent intron).

## Supplementary Figure S8

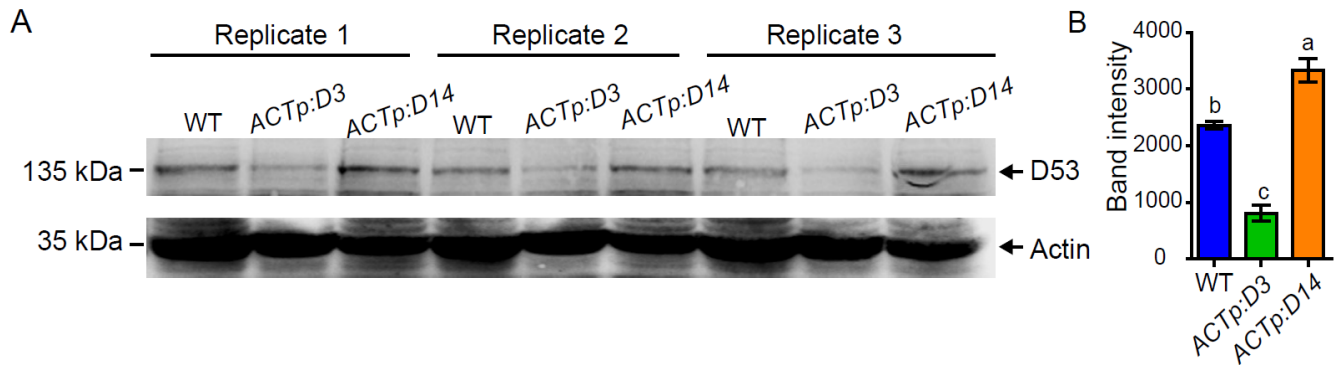

**Supplementary Figure S8. Comparative analysis of D53 protein levels in different backgrounds.** (A) D53 protein levels in WT, *ACTp:D3* and *ACTp:D14* over-expressing lines grown on 4% sucrose plates detected by immunoblotting with an anti-D53 polyclonal antibody. (B) Average band intensity of the D53 proteins quantified in the WT, *ACTp:D3* and *ACTp:D14* over-expressing lines using Image J software. Values are mean  $\pm$  SE (n=3). Different lower case letters denote significant differences,  $p < 0.05$ , one-way ANOVA following Tukey's test for multiple comparisons.
